# Supplementary material for: Purkinje cell misfiring generates high-amplitude action tremors that are corrected by cerebellar deep brain stimulation
Source: eLife. 2020 Mar 17;9:e51928. doi: 10.7554/eLife.51928 (PMC7077982; doi:10.7554/eLife.51928)
Supplement: Figure 1—figure supplement 2—source data 1. [file elife-51928-fig1-figsupp2-data1.xlsx]

## Sheet: Sheet1
FIGURE 1 - S2
Panel A
	Male			Female
	Mean	SEM	N	Mean	SEM	N
Slc32a1flox/flox Baseline	0.0025694	0.000369252	10	0.001718	0.000241981	6
Slc32a1flox/flox + Harmaline	0.0232619	0.00718512	11	0.015545	0.00393546	6
Pcp2Cre;Slc32a1flox/flox Baseline	0.00192014	0.000395158	7	0.0008516	0.000203281	5
Pcp2Cre;Slc32a1flox/flox + Harmaline	0.00366237	0.000942159	8	0.0015414	0.000555111	5
Panel B
	Male			Female
	Mean	SEM	N	Mean	SEM	N
Slc32a1flox/flox Baseline	0.0011603	0.000146835	10	0.0008185	0.00013114	6
Slc32a1flox/flox + Harmaline	0.00239218	0.000586405	11	0.00136233	0.000226435	6
Pcp2Cre;Slc32a1flox/flox Baseline	0.000722429	0.000162151	7	0.0003912	9.09502e-05	5
Pcp2Cre;Slc32a1flox/flox + Harmaline	0.00099625	0.000248741	8	0.000515	0.000205214	5
