# Supplementary material for: Purkinje cell misfiring generates high-amplitude action tremors that are corrected by cerebellar deep brain stimulation
Source: eLife. 2020 Mar 17;9:e51928. doi: 10.7554/eLife.51928 (PMC7077982; doi:10.7554/eLife.51928)
Supplement: Figure 1—figure supplement 3—source data 1. [file elife-51928-fig1-figsupp3-data1.xlsx]

## Sheet: Sheet1
FIGURE 1 - S3
Panel A
	Fastigial			Interposed			Dentate
	Mean	SEM	n	Mean	SEM	n	Mean	SEM	n
Slc32a1flox/flox	0.000365599	1.75346e-05	16	0.000401468	3.36208e-05	16	0.000153239	2.28004e-05	16
Pcp2Cre;Slc32a1flox/flox	0.000284922	2.02398e-05	14	0.000198188	1.77133e-05	14	7.2094e-05	1.28966e-05	14
Panel B
	Fastigial			Interposed			Dentate
	Mean	SEM	n	Mean	SEM	n	Mean	SEM	n
Slc32a1flox/flox	2.39044	0.124805	16	1.95894	0.199535	16	0.70275	0.115585	16
Pcp2Cre;Slc32a1flox/flox	1.54943	0.141219	14	1.04171	0.119458	14	0.308	0.0636836	14
Panel C
	Inferior Olive
	Mean	SEM	n
Slc32a1flox/flox	0.00135	8.815e-05	9
Pcp2Cre;Slc32a1flox/flox	0.001324	4.79e-05	6
Panel D
	Inferior Olive
	Mean	SEM	n
Slc32a1flox/flox	8.284	0.499	9
Pcp2Cre;Slc32a1flox/flox	9.119	0.6577	6
