# Supplementary material for: Purkinje cell misfiring generates high-amplitude action tremors that are corrected by cerebellar deep brain stimulation
Source: eLife. 2020 Mar 17;9:e51928. doi: 10.7554/eLife.51928 (PMC7077982; doi:10.7554/eLife.51928)
Supplement: Figure 1—source data 1. [file elife-51928-fig1-data1.xlsx]

## Sheet: Sheet1
FIGURE 1
	Panel F and G			Panel G			Panel F and G			Panel G
Frequency (Hz)	Slc32a1flox/flox Baseline			Slc32a1flox/flox + Harmaline			Pcp2Cre;Slc32a1flox/flox Baseline			Pcp2Cre;Slc32a1flox/flox + Harmaline
	Mean	SEM	N	Mean	SEM	N	Mean	SEM	N	Mean	SEM	N
0	2.20437e-06	1.19188e-07	16	1.95163e-06	1.02576e-07	16	2.16167e-06	1.08543e-07	12	2.18769e-06	1.90889e-07	13
0.5	2.07875e-06	1.37722e-07	16	1.31488e-06	8.35414e-08	16	2.02583e-06	1.76289e-07	12	1.73531e-06	2.34026e-07	13
1	2.34563e-06	2.35312e-07	16	5.74125e-07	8.87926e-08	16	1.68508e-06	2.77315e-07	12	1.17854e-06	2.75412e-07	13
1.5	3.87937e-06	3.83543e-07	16	7.60188e-07	1.17175e-07	16	2.34417e-06	3.88728e-07	12	1.46638e-06	3.68194e-07	13
2	5.75062e-06	5.51377e-07	16	1.03475e-06	1.59026e-07	16	3.41892e-06	6.00569e-07	12	1.78977e-06	5.2715e-07	13
2.5	8.27e-06	7.83952e-07	16	1.39731e-06	2.4719e-07	16	5.10583e-06	1.00064e-06	12	2.67931e-06	8.42789e-07	13
3	1.10256e-05	1.06519e-06	16	1.89081e-06	3.77863e-07	16	7.44e-06	1.63774e-06	12	3.90185e-06	1.21313e-06	13
3.5	1.53613e-05	1.71057e-06	16	2.77131e-06	6.42537e-07	16	1.01258e-05	2.35627e-06	12	5.98685e-06	1.81745e-06	13
4	1.99862e-05	2.48614e-06	16	3.93338e-06	8.568e-07	16	1.3005e-05	2.77924e-06	12	8.59054e-06	2.51562e-06	13
4.5	2.66313e-05	3.62956e-06	16	6.18125e-06	1.18619e-06	16	1.73542e-05	3.76183e-06	12	1.24838e-05	3.86163e-06	13
5	3.3375e-05	4.48343e-06	16	9.09687e-06	1.56894e-06	16	2.00983e-05	4.16839e-06	12	1.93892e-05	7.03351e-06	13
5.5	3.93312e-05	5.16658e-06	16	1.44013e-05	2.41775e-06	16	2.46483e-05	4.66646e-06	12	2.5859e-05	8.61658e-06	13
6	4.53e-05	5.59051e-06	16	2.00825e-05	3.74536e-06	16	3.0485e-05	5.70485e-06	12	3.06822e-05	9.02099e-06	13
6.5	5.37839e-05	6.54205e-06	16	2.13481e-05	4.65255e-06	16	3.81877e-05	8.50565e-06	12	4.60292e-05	1.7404e-05	13
7	6.74109e-05	8.44864e-06	16	2.19988e-05	4.68187e-06	16	4.58863e-05	9.56718e-06	12	6.95465e-05	2.89845e-05	13
7.5	7.38335e-05	8.03242e-06	16	2.42644e-05	4.4497e-06	16	5.44902e-05	1.02473e-05	12	9.70991e-05	4.08902e-05	13
8	7.55443e-05	8.47823e-06	16	3.01925e-05	5.0697e-06	16	6.04838e-05	1.17517e-05	12	0.000130362	5.78564e-05	13
8.5	8.49728e-05	1.08651e-05	16	4.14373e-05	7.17256e-06	16	6.32974e-05	1.32539e-05	12	0.000150675	6.00881e-05	13
9	9.1095e-05	1.16079e-05	16	6.26917e-05	1.22951e-05	16	7.23322e-05	1.48124e-05	12	0.000161347	5.81549e-05	13
9.5	9.65831e-05	1.2353e-05	16	0.000113033	4.18484e-05	16	8.16774e-05	1.78406e-05	12	0.00018179	7.04982e-05	13
10	0.000105321	1.3369e-05	16	0.000198965	7.53572e-05	16	8.69243e-05	1.90709e-05	12	0.000193149	8.14991e-05	13
10.5	0.000109203	1.31824e-05	16	0.000351354	8.33327e-05	16	8.80728e-05	1.93088e-05	12	0.000180472	7.24696e-05	13
11	0.000109853	1.32189e-05	16	0.000885177	0.000229328	16	8.54332e-05	1.8233e-05	12	0.000150535	5.12011e-05	13
11.5	0.000108337	1.35819e-05	16	0.00197128	0.000585126	16	7.76606e-05	1.53755e-05	12	0.000125172	3.14515e-05	13
12	0.000105753	1.34355e-05	16	0.00344581	0.00147784	16	7.17241e-05	1.49405e-05	12	0.000128734	3.19042e-05	13
12.5	0.000103603	1.30185e-05	16	0.00355115	0.00129859	16	6.64977e-05	1.42763e-05	12	0.000129678	3.50074e-05	13
13	0.000103174	1.24752e-05	16	0.00249306	0.000659484	16	6.32053e-05	1.31815e-05	12	0.000123908	3.22949e-05	13
13.5	9.81351e-05	1.07261e-05	16	0.00190337	0.000494391	16	6.09207e-05	1.26289e-05	12	0.000110152	2.85629e-05	13
14	9.43722e-05	1.05955e-05	16	0.00145893	0.000487986	16	6.03009e-05	1.23641e-05	12	9.57722e-05	2.68912e-05	13
14.5	9.15474e-05	1.08961e-05	16	0.00100209	0.000307351	16	5.87493e-05	1.16538e-05	12	9.74516e-05	2.70635e-05	13
15	8.83078e-05	1.04832e-05	16	0.000599355	0.000150328	16	5.53792e-05	1.08798e-05	12	0.000100521	2.51912e-05	13
15.5	8.89273e-05	1.15607e-05	16	0.000429518	0.000107955	16	5.07654e-05	8.94241e-06	12	0.000100949	2.71411e-05	13
16	8.57125e-05	1.06672e-05	16	0.000312624	7.47363e-05	16	4.77429e-05	8.20053e-06	12	9.19522e-05	2.40302e-05	13
16.5	8.36247e-05	1.02418e-05	16	0.000248321	5.13211e-05	16	4.50381e-05	7.932e-06	12	8.86852e-05	2.28177e-05	13
17	7.85418e-05	8.60303e-06	16	0.000200367	3.56384e-05	16	4.16583e-05	7.04491e-06	12	8.51868e-05	2.07451e-05	13
17.5	7.79371e-05	9.40108e-06	16	0.000183409	2.8079e-05	16	4.16325e-05	7.24739e-06	12	7.99546e-05	1.98413e-05	13
18	7.68314e-05	9.21203e-06	16	0.000175803	2.58567e-05	16	4.01417e-05	6.3774e-06	12	7.31663e-05	1.72886e-05	13
18.5	7.61406e-05	9.54118e-06	16	0.00015195	2.26137e-05	16	3.96917e-05	6.98716e-06	12	6.68649e-05	1.42857e-05	13
19	7.35655e-05	8.62757e-06	16	0.000126738	2.08608e-05	16	4.01703e-05	8.89739e-06	12	7.16664e-05	1.58741e-05	13
19.5	7.39672e-05	8.86983e-06	16	0.000114243	2.33388e-05	16	3.81089e-05	8.45135e-06	12	6.85662e-05	1.42707e-05	13
20	6.91174e-05	7.30977e-06	16	0.000100046	1.94863e-05	16	3.71309e-05	8.09383e-06	12	6.07928e-05	1.31776e-05	13
20.5	6.79861e-05	7.86788e-06	16	7.83537e-05	1.26767e-05	16	3.70458e-05	7.61701e-06	12	5.82648e-05	1.36284e-05	13
21	6.4015e-05	6.81988e-06	16	7.24898e-05	1.01954e-05	16	3.6899e-05	7.50184e-06	12	5.31093e-05	1.11064e-05	13
21.5	6.13174e-05	6.40304e-06	16	7.63482e-05	1.11375e-05	16	3.3875e-05	7.17248e-06	12	4.6824e-05	9.74246e-06	13
22	6.00691e-05	7.17325e-06	16	8.12591e-05	1.43497e-05	16	3.2375e-05	6.8255e-06	12	4.24062e-05	8.41888e-06	13
22.5	6.04976e-05	7.06459e-06	16	8.91478e-05	1.61347e-05	16	3.195e-05	6.22469e-06	12	4.35141e-05	8.78951e-06	13
23	5.79791e-05	6.63717e-06	16	9.07222e-05	1.62026e-05	16	2.97992e-05	5.77717e-06	12	4.65269e-05	1.12873e-05	13
23.5	5.345e-05	5.50126e-06	16	9.76597e-05	1.91134e-05	16	2.93267e-05	6.05372e-06	12	4.09162e-05	9.69478e-06	13
24	5.20063e-05	5.44561e-06	16	0.000114503	2.93965e-05	16	2.71192e-05	5.49347e-06	12	3.73608e-05	8.90959e-06	13
24.5	5.07416e-05	6.61495e-06	16	0.000116611	3.38703e-05	16	2.53075e-05	4.96218e-06	12	3.86249e-05	9.64066e-06	13
25	4.46562e-05	5.74521e-06	16	0.000100905	1.99878e-05	16	2.53892e-05	4.8837e-06	12	3.85613e-05	9.47752e-06	13
25.5	4.22938e-05	5.04941e-06	16	0.000103238	2.1501e-05	16	2.49883e-05	4.77833e-06	12	3.35907e-05	8.55683e-06	13
26	4.26875e-05	4.86747e-06	16	9.9998e-05	2.15919e-05	16	2.46592e-05	4.84252e-06	12	3.11732e-05	8.25128e-06	13
26.5	4.09e-05	4.54966e-06	16	9.20874e-05	2.16719e-05	16	2.28025e-05	4.14515e-06	12	3.07313e-05	8.2193e-06	13
27	4.02062e-05	4.623e-06	16	8.45911e-05	2.13476e-05	16	2.20542e-05	4.10641e-06	12	3.09188e-05	7.92731e-06	13
27.5	3.77625e-05	4.0489e-06	16	7.45004e-05	1.88889e-05	16	2.30983e-05	4.84021e-06	12	3.21044e-05	8.15321e-06	13
28	3.8625e-05	3.85958e-06	16	6.85296e-05	1.69981e-05	16	2.42333e-05	4.43644e-06	12	3.26623e-05	8.42988e-06	13
28.5	3.89375e-05	4.00437e-06	16	6.13183e-05	1.54477e-05	16	2.471e-05	3.97329e-06	12	2.99808e-05	6.50732e-06	13
29	3.59625e-05	3.3926e-06	16	5.54739e-05	1.50651e-05	16	2.30183e-05	3.55925e-06	12	2.682e-05	5.60382e-06	13
29.5	3.53625e-05	3.14042e-06	16	5.49768e-05	1.79788e-05	16	2.37325e-05	3.40492e-06	12	2.67392e-05	5.64379e-06	13
30	3.73937e-05	3.86056e-06	16	5.46763e-05	1.68422e-05	16	2.48667e-05	3.15591e-06	12	2.96315e-05	5.16255e-06	13
Panel H				Panel I
summed alpha+beta	summed alpha+beta	summed alpha+beta	summed alpha+beta	summed gamma	summed gamma	summed gamma	summed gamma
Slc32a1flox/flox Baseline	Slc32a1flox/flox + Harmaline	Pcp2Cre;Slc32a1flox/flox Baseline	Pcp2Cre;Slc32a1flox/flox + Harmaline	Slc32a1flox/flox Baseline	Slc32a1flox/flox + Harmaline	Pcp2Cre;Slc32a1flox/flox Baseline	Pcp2Cre;Slc32a1flox/flox + Harmaline
0.00201	0.006275	0.002071	0.002688	0.000909	0.000544	0.000755	0.000666
0.002288	0.036652	0.000921	0.002604	0.001084	0.002231	0.000402	0.000568
0.00237	0.087763	0.001774	0.002206	0.001041	0.004854	0.000549	0.000569
0.003317	0.009586	0.00108	0.000511	0.001626	0.001229	0.000398	0.000213
0.004482	0.013558	0.003248	0.009011	0.001915	0.001159	0.000922	0.001246
0.001163	0.033772	0.000531	0.0039	0.000724	0.0016	0.000215	0.000579
0.00147	0.006673	0.00107	0.000268	0.000888	0.000861	0.000465	0.000178
0.002211	0.014038	0.003173	0.000526	0.001344	0.001371	0.001586	0.000296
0.000984	0.010407	0.000307	0.005584	0.000505	0.001077	0.000205	0.002303
0.002215	0.003802	0.00079	0.001233	0.001135	0.000661	0.000704	0.000274
0.00413	0.012582	0.001434	0.003002	0.001787	0.000725	0.000434	0.001265
0.00107	0.02373	0.000854	0.002505	0.000465	0.004712	0.000378	0.000645
0.001664	0.026317		0.00219	0.000831	0.001593		0.001746
0.001261	0.009976			0.000548	0.002045
0.001945	0.009001			0.000787	0.001347
0.002317	0.016681			0.000922	0.00227
