# Supplementary material for: Purkinje cell misfiring generates high-amplitude action tremors that are corrected by cerebellar deep brain stimulation
Source: eLife. 2020 Mar 17;9:e51928. doi: 10.7554/eLife.51928 (PMC7077982; doi:10.7554/eLife.51928)
Supplement: Figure 2—source data 1. [file elife-51928-fig2-data1.xlsx]

## Sheet: Sheet1
FIGURE 2
SS = Purkinje cell simple spike
CS = Purkinje cell complex spike
FR = Firing Rate
CV = coefficient of variance
Pre Pause = Pre CS Pause
Post Pause = Post CS Pause
Panel H				Panel I				Panel J				Panel K				Panel L				Panel M				Panel N				Panel O				Panel P
SS FR	SS FR	SS FR	SS FR	SS CV	SS CV	SS CV	SS CV	SS CV2	SS CV2	SS CV2	SS CV2	CS FR	CS FR	CS FR	CS FR	CS CV	CS CV	CS CV	CS CV	CS CV2	CS CV2	CS CV2	CS CV2	Pre Pause	Pre Pause	Pre Pause	Pre Pause	Post Pause	Post Pause	Post Pause	Post Pause	SS to CS ratio	SS to CS ratio	SS to CS ratio	SS to CS ratio
Slc32a1flox/flox Baseline	Slc32a1flox/flox + Harmaline	Pcp2Cre;Slc32a1flox/flox Baseline	Pcp2Cre;Slc32a1flox/flox + Harmaline	Slc32a1flox/flox Baseline	Slc32a1flox/flox + Harmaline	Pcp2Cre;Slc32a1flox/flox Baseline	Pcp2Cre;Slc32a1flox/flox + Harmaline	Slc32a1flox/flox Baseline	Slc32a1flox/flox + Harmaline	Pcp2Cre;Slc32a1flox/flox Baseline	Pcp2Cre;Slc32a1flox/flox + Harmaline	Slc32a1flox/flox Baseline	Slc32a1flox/flox + Harmaline	Pcp2Cre;Slc32a1flox/flox Baseline	Pcp2Cre;Slc32a1flox/flox + Harmaline	Slc32a1flox/flox Baseline	Slc32a1flox/flox + Harmaline	Pcp2Cre;Slc32a1flox/flox Baseline	Pcp2Cre;Slc32a1flox/flox + Harmaline	Slc32a1flox/flox Baseline	Slc32a1flox/flox + Harmaline	Pcp2Cre;Slc32a1flox/flox Baseline	Pcp2Cre;Slc32a1flox/flox + Harmaline	Slc32a1flox/flox Baseline	Slc32a1flox/flox + Harmaline	Pcp2Cre;Slc32a1flox/flox Baseline	Pcp2Cre;Slc32a1flox/flox + Harmaline	Slc32a1flox/flox Baseline	Slc32a1flox/flox + Harmaline	Pcp2Cre;Slc32a1flox/flox Baseline	Pcp2Cre;Slc32a1flox/flox + Harmaline	Slc32a1flox/flox Baseline	Slc32a1flox/flox + Harmaline	Pcp2Cre;Slc32a1flox/flox Baseline	Pcp2Cre;Slc32a1flox/flox + Harmaline
108.415	70.9606	35.6427	4.44461	0.348713	0.705791	1.2346	0.68819	0.339403	0.502398	0.749999	0.750786	1.38019	2.31818	1.43774	1.11115	0.700195	0.710611	0.928392	1.57721	0.747845	0.779119	0.870403	1.0889	0.00575	0.010372	0.02008	0.079034	0.012635	0.007878	0.02068	0.047596	77.4286	30.2917	24.2273	3.88235
65.3573	45.0997	49.9992	6.28307	0.546469	1.19134	0.857359	3.27365	0.516454	0.848338	0.639725	0.857038	1.24014	1.91605	0.93394	4.8627	0.697231	0.784396	0.736052	0.259605	0.898718	0.7448	0.923725	0.237767	0.010881	0.021129	0.018604	0.155294	0.0177	0.014737	0.032363	0.117933	52.28	23.4766	51.6897	1.28767
47.2999	77.9478	42.6755	46.3591	0.322199	0.863877	1.031	3.2123	0.325574	0.532408	0.69267	0.646199	1.03406	2.39524	1.66701	2.9163	0.768895	0.639	0.656883	0.94391	1.03236	0.565957	0.799977	0.685433	0.011096	0.01421	0.030819	0.077718	0.031781	0.016787	0.049088	0.005188	44.3125	32.475	25.098	15.7159
38.4698	44.6407	115.232	40.2266	0.640686	2.54273	0.690272	1.90843	0.508578	0.563909	0.383729	0.742841	0.866738	2.06701	2.26103	4.97408	0.725481	0.454539	0.915126	0.336245	1.07829	0.445689	0.882443	0.351471	0.012758	0.093081	0.006132	0.09928	0.038496	0.012858	0.007188	0.017262	42.7407	21.254	50.5175	8.03333
81.1296	13.2676	40.1108	8.6413	0.534194	0.812923	0.793725	1.53344	0.506131	0.642233	0.587232	1.0366	1.51018	1.14023	1.582	5.52403	0.764035	0.677455	1.03386	0.256201	0.884256	0.671795	0.929529	0.274024	0.008445	0.0272	0.019015	0.135654	0.014018	0.033179	0.030122	0.018383	53.3684	11.5852	25.195	1.5629
59.9554	10.8496	44.2007	46.8457	0.284421	1.41123	1.08294	1.79469	0.31491	1.15983	0.458016	0.670079	1.18011	4.38671	1.23428	6.97347	0.769667	0.317278	0.861005	0.173941	0.924287	0.302577	0.7956	0.134498	0.008669	0.157994	0.028751	0.015969	0.022793	0.013506	0.033966	0.002909	50.3781	2.45454	34.8684	6.70167
95.4855	53.5544	60.0037	31.1405	0.481714	1.46627	0.965163	3.20144	0.460604	0.667102	0.514929	0.71926	1.44008	4.50177	1.2341	7.05539	0.734862	0.299576	0.812916	0.34989	0.929803	0.322674	0.948206	0.278114	0.007547	0.039395	0.018501	0.074597	0.012127	0.013539	0.027932	0.053097	65.8483	11.8524	47.3421	4.4033
65.5339	58.9999	44.4714	38.3793	0.35671	1.41018	1.60755	1.92883	0.381355	0.642296	0.689168	0.677836	1.36508	3.76772	0.683406	6.67161	0.636006	0.73043	0.644767	0.203054	0.782921	0.541239	0.878639	0.13739	0.009194	0.020586	0.036744	0.072343	0.020056	0.011577	0.073676	0.032434	47.8321	15.5903	63.5238	5.74831
113.978	60.5767	71.6093	19.3116	0.52323	2.46567	0.850999	1.09194	0.392026	0.550301	0.467645	0.767028	1.10011	2.24605	1.43352	7.52321	0.859298	0.646486	0.907193	0.268394	0.927263	0.606742	0.970413	0.197453	0.003949	0.031423	0.008326	0.072544	0.006351	0.027566	0.034676	0.011125	100.559	26.8374	48.8182	2.5658
94.0103	96.3516	41.928	21.6575	0.858338	0.284895	0.862527	1.45817	0.538208	0.254631	0.410488	1.20383	1.40015	1.6202	1.05028	5.74795	0.798953	0.659745	0.886021	0.310895	0.856504	0.82634	0.967634	0.191117	0.00883	0.005882	0.018256	0.129761	0.013706	0.01447	0.052071	0.003592	66.1972	58.7439	39.2969	3.75111
116.723	50.5865	65.8087	23.965	0.461031	2.15363	1.01278	1.5971	0.439938	0.689362	0.371042	1.09068	1.35046	4.09694	1.04061	5.68058	0.543431	0.698901	0.975072	0.134907	0.670135	0.63869	0.94685	0.117934	0.006026	0.082659	0.022495	0.11004	0.012162	0.012634	0.04343	0.004578	85.3781	12.3337	62.6381	4.2068
92.9245	33.2621	32.2713	32.5734	0.531512	1.36039	0.608532	1.74484	0.472974	0.833372	0.39752	0.913588	1.65044	3.40478	1.27378	5.01864	0.691784	0.312689	0.883918	0.387429	0.853554	0.297255	0.874301	0.174642	0.006915	0.048501	0.020694	0.132434	0.010819	0.02357	0.044475	0.003063	55.74	9.72523	25.2031	6.48652
75.0596	33.5976	55.0844		0.400033	1.53186	2.67737		0.454982	0.78362	0.575414		1.01013	3.36431	1.47608		0.690684	0.433333	0.894331		0.907101	0.413701	0.989058		0.007114	0.067271	0.057945		0.015685	0.017056	0.056325		73.5784	9.95286	36.4889
57.9656	38.7825	65.5438		0.519712	1.00775	1.73561		0.500274	0.686391	0.510736		1.29012	3.03545	1.37592		0.963966	0.689806	0.937189		1.01609	0.402546	0.935832		0.011269	0.031373	0.033824		0.0248	0.033498	0.037334		44.5846	12.7524	47.2072
62.6879		74.9791		0.538345		1.26751		0.52966		0.584102		1.43102		3.18251		0.708872		0.873441		0.852116		0.910152		0.011154		0.012132		0.020715		0.013012		43.5722		23.4859
66.7398				0.338466				0.38673				0.956284				0.709549				0.849425				0.008809				0.020628				69.3377
80.7613				0.507839				0.45084				1.50002				0.88179				0.901454				0.006326				0.008012				53.6611
74.7916				0.629979				0.478909				1.50023				0.667444				0.865361				0.008777				0.022634				49.1974
