# Supplementary material for: Purkinje cell misfiring generates high-amplitude action tremors that are corrected by cerebellar deep brain stimulation
Source: eLife. 2020 Mar 17;9:e51928. doi: 10.7554/eLife.51928 (PMC7077982; doi:10.7554/eLife.51928)
Supplement: Figure 3—source data 1. [file elife-51928-fig3-data1.xlsx]

## Sheet: Sheet1
FIGURE 3
CN = cerebellar nuclei cell
FR = Firing Rate
CV = coefficient of variance
Panel F				Panel G				Panel H
CN FR	CN FR	CN FR	CN FR	CN CV	CN CV	CN CV	CN CV	CN CV2	CN CV2	CN CV2	CN CV2
Slc32a1flox/flox Baseline	Slc32a1flox/flox + Harmaline	Pcp2Cre;Slc32a1flox/flox Baseline	Pcp2Cre;Slc32a1flox/flox + Harmaline	Slc32a1flox/flox Baseline	Slc32a1flox/flox + Harmaline	Pcp2Cre;Slc32a1flox/flox Baseline	Pcp2Cre;Slc32a1flox/flox + Harmaline	Slc32a1flox/flox Baseline	Slc32a1flox/flox + Harmaline	Pcp2Cre;Slc32a1flox/flox Baseline	Pcp2Cre;Slc32a1flox/flox + Harmaline
71.1576	73.6292	75.3943	79.488	0.481605	0.975887	0.263975	0.272487	0.419654	0.623102	0.151373	0.152125
91.2793	31.6994	80.9228	103.614	0.295805	1.87075	0.210462	0.333717	0.321457	0.733253	0.261747	0.239498
109.184	42.0349	71.1524	63.1772	0.365849	0.352403	0.23115	0.406779	0.39152	0.371807	0.123873	0.261779
91.6308	83.4527	55.7797	67.7876	0.349622	0.510212	0.507028	0.48558	0.390168	0.654047	0.48067	0.277098
53.6602	132.889	110.755	133.386	0.262823	0.853478	0.168645	0.139594	0.288538	0.484244	0.137479	0.120578
28.5714	105.589	15.349	79.1427	0.579114	0.608261	0.491462	0.730172	0.585906	0.304845	0.224943	0.489865
48.2501	79.7512	40.202	50.5479	0.377069	0.48519	0.220435	0.476734	0.283542	0.429663	0.250709	0.355044
28.9855	43.5251	79.6102	107.203	0.80481	0.983052	0.157406	0.286978	0.57898	0.631378	0.13612	0.188531
44.4199	118.996	122.135	51.3236	0.21849	0.497433	0.478549	0.279509	0.240943	0.352333	0.332251	0.333757
33.9773	61.2847	44.6693	84.7134	0.487472	1.40389	0.843861	0.343125	0.484239	0.48767	0.332593	0.254656
61.7286	58.3034	150.679	84.0898	0.607585	0.932649	0.233972	0.309604	0.525394	0.57687	0.118573	0.344877
59.6943	43.1318	51.4464		0.409474	0.830824	0.279669		0.428479	0.595535	0.19813
59.8354	62.934	82.534		0.5259	1.24664	0.289328		0.498145	0.810947	0.166988
99.6585	106.606	106.512		0.335075	0.564457	0.265072		0.352223	0.311689	0.143067
129.987		114.262		0.383361		0.378351		0.364819		0.213127
65.103		85.6817		0.447611		0.273022		0.417472		0.181716
60.4578		88.0911		0.612167		0.33797		0.459843		0.213562
61.3075		61.4883		0.335845		0.539323		0.28845		0.491477
64.1931				0.69166				0.547522
