# Supplementary material for: Purkinje cell misfiring generates high-amplitude action tremors that are corrected by cerebellar deep brain stimulation
Source: eLife. 2020 Mar 17;9:e51928. doi: 10.7554/eLife.51928 (PMC7077982; doi:10.7554/eLife.51928)
Supplement: Figure 4—figure supplement 3—source data 1. [file elife-51928-fig4-figsupp3-data1.xlsx]

## Sheet: Sheet1
FIGURE 4 - S3
Panel A
Frequency (Hz)	0mW			0.14mW			0.43mW			1.1mW			2.1mW			2.8mW			3.3mW			3.6mW
	Mean	SEM	N	Mean	SEM	N	Mean	SEM	N	Mean	SEM	N	Mean	SEM	N	Mean	SEM	N	Mean	SEM	N	Mean	SEM	N
0	6.145e-07	1.69001e-07	4	7.4725e-07	1.75115e-07	4	7.655e-07	1.70199e-07	4	8.6125e-07	1.62077e-07	4	5.805e-07	7.35419e-08	4	1.442e-06	5.76514e-07	4	1.113e-06	4.93085e-07	4	1.182e-06	6.15644e-07	4
0.5	3.4785e-07	9.27126e-08	4	4e-07	8.621e-08	4	4.1675e-07	8.12664e-08	4	4.62e-07	7.76048e-08	4	3.195e-07	3.7248e-08	4	7.455e-07	2.89425e-07	4	5.795e-07	2.43902e-07	4	6.1325e-07	3.06672e-07	4
1	1.45275e-08	3.173e-09	4	1.06625e-08	1.60716e-09	4	1.295e-08	1.94487e-09	4	1.155e-08	2.47543e-09	4	9.585e-09	8.22126e-10	4	7.375e-09	7.49828e-10	4	8.28e-09	1.59412e-09	4	8.715e-09	1.56635e-09	4
1.5	9.6375e-09	1.9726e-09	4	6.205e-09	5.13817e-10	4	7.2925e-09	9.47904e-10	4	6.835e-09	1.01974e-09	4	6.1375e-09	5.57649e-10	4	5.005e-09	4.38796e-10	4	5.63e-09	2.75832e-10	4	5.6025e-09	6.016e-10	4
2	8.9075e-09	1.68716e-09	4	6.7675e-09	6.55367e-10	4	8.05e-09	1.18769e-09	4	7.805e-09	9.08529e-10	4	6.15e-09	9.00009e-10	4	4.88e-09	2.29092e-10	4	5.6725e-09	2.60236e-10	4	5.8275e-09	1.01728e-09	4
2.5	1.0825e-08	2.07339e-09	4	9.2275e-09	1.54092e-09	4	1.20275e-08	1.68842e-09	4	1.07375e-08	1.12693e-09	4	8.37e-09	1.49002e-09	4	7.165e-09	7.93689e-10	4	7.27e-09	8.36232e-10	4	7.295e-09	1.42783e-09	4
3	1.7945e-08	5.04437e-09	4	1.4665e-08	2.9214e-09	4	2.0925e-08	4.32384e-09	4	1.815e-08	3.28342e-09	4	1.6985e-08	3.92673e-09	4	1.305e-08	2.37785e-09	4	1.25725e-08	2.60946e-09	4	1.16075e-08	1.65456e-09	4
3.5	3.45e-08	9.47848e-09	4	3.135e-08	7.94245e-09	4	3.9075e-08	1.01687e-08	4	3.61e-08	7.12893e-09	4	3.39875e-08	9.15702e-09	4	2.65e-08	5.90551e-09	4	2.77e-08	7.50411e-09	4	2.01e-08	2.60224e-09	4
4	7.0575e-08	2.02578e-08	4	6.7425e-08	2.06785e-08	4	8.3025e-08	2.18104e-08	4	7.295e-08	2.09631e-08	4	6.8525e-08	2.02372e-08	4	6.165e-08	1.49889e-08	4	6.24e-08	2.01418e-08	4	4.295e-08	6.00396e-09	4
4.5	1.5775e-07	4.10272e-08	4	1.45175e-07	5.00292e-08	4	1.9775e-07	5.51247e-08	4	1.4685e-07	4.39984e-08	4	1.36e-07	4.80486e-08	4	1.23425e-07	1.92829e-08	4	1.64625e-07	7.36199e-08	4	1.09725e-07	1.446e-08	4
5	3.635e-07	9.37714e-08	4	2.8925e-07	9.23024e-08	4	4.035e-07	1.05434e-07	4	2.9725e-07	6.93474e-08	4	2.89625e-07	8.52793e-08	4	2.385e-07	3.19726e-08	4	3.55e-07	1.59987e-07	4	2.5675e-07	3.69152e-08	4
5.5	5.985e-07	1.74948e-07	4	4.7675e-07	1.29082e-07	4	7.2975e-07	2.0504e-07	4	4.8525e-07	9.53523e-08	4	5.31e-07	1.50121e-07	4	4.0775e-07	6.06305e-08	4	6.3475e-07	1.86772e-07	4	4.3225e-07	3.8911e-08	4
6	1.15425e-06	2.98141e-07	4	9.11e-07	2.25539e-07	4	1.46725e-06	4.31599e-07	4	8.9225e-07	2.20122e-07	4	9.73e-07	2.52983e-07	4	9.6275e-07	9.22184e-08	4	1.25875e-06	3.34392e-07	4	8.35e-07	1.04997e-07	4
6.5	2.4875e-06	5.45808e-07	4	1.93325e-06	4.8033e-07	4	3.1925e-06	1.03869e-06	4	2.1225e-06	4.94526e-07	4	2.00575e-06	4.38413e-07	4	2.305e-06	3.32929e-07	4	2.48e-06	7.70595e-07	4	2.105e-06	4.60805e-07	4
7	5.14e-06	1.22416e-06	4	4.4075e-06	8.19618e-07	4	6.575e-06	1.74347e-06	4	4.395e-06	7.77233e-07	4	4.0525e-06	7.18881e-07	4	4.945e-06	4.98088e-07	4	4.6075e-06	1.63413e-06	4	5.2325e-06	1.60177e-06	4
7.5	7.8675e-06	2.07297e-06	4	6.855e-06	7.15874e-07	4	9.6575e-06	1.91626e-06	4	6.6925e-06	9.08794e-07	4	6.17e-06	5.5382e-07	4	6.4825e-06	5.41962e-07	4	7.1375e-06	2.97476e-06	4	7.465e-06	2.04759e-06	4
8	6.985e-06	1.69216e-06	4	6.065e-06	7.76343e-07	4	7.635e-06	1.35975e-06	4	6.3425e-06	7.2853e-07	4	6.615e-06	7.15361e-07	4	6.2775e-06	1.26501e-06	4	7.34e-06	3.13917e-06	4	6.1825e-06	1.60843e-06	4
8.5	7.235e-06	1.22916e-06	4	5.9525e-06	7.10485e-07	4	7.835e-06	1.02041e-06	4	6.91e-06	4.74184e-07	4	7.735e-06	4.19811e-07	4	7.6225e-06	1.95387e-06	4	8.7025e-06	3.19166e-06	4	8.805e-06	2.13267e-06	4
9	1.09325e-05	2.60302e-06	4	1.0225e-05	2.04629e-06	4	1.171e-05	1.79233e-06	4	1.10975e-05	1.14069e-06	4	1.24e-05	1.43236e-06	4	1.56825e-05	4.71202e-06	4	1.7025e-05	3.79942e-06	4	2.27475e-05	7.70064e-06	4
9.5	1.12575e-05	3.32209e-06	4	9.61e-06	1.3162e-06	4	1.375e-05	1.2413e-06	4	1.805e-05	1.45402e-06	4	3.44e-05	8.01072e-06	4	5.035e-05	1.73222e-05	4	6.1875e-05	1.84497e-05	4	0.0001154	4.95637e-05	4
10	7.99e-06	2.16359e-06	4	6.3625e-06	6.80507e-07	4	1.651e-05	4.73981e-06	4	3.0725e-05	6.68411e-06	4	8.46e-05	2.4671e-05	4	0.000124675	4.46364e-05	4	0.00016275	5.97026e-05	4	0.0003238	0.000149906	4
10.5	4.8675e-06	1.01093e-06	4	4.9225e-06	3.55208e-07	4	9.245e-06	2.05711e-06	4	1.57375e-05	2.81257e-06	4	3.57575e-05	9.90135e-06	4	4.99325e-05	1.57218e-05	4	6.215e-05	2.1798e-05	4	0.00012325	5.44802e-05	4
11	3.6075e-06	8.19506e-07	4	3.785e-06	2.53032e-07	4	4.435e-06	3.56195e-07	4	5.705e-06	6.43797e-07	4	6.1125e-06	1.04517e-06	4	7.39e-06	1.98487e-06	4	7.96e-06	1.76499e-06	4	1.3985e-05	4.71579e-06	4
11.5	2.615e-06	5.09665e-07	4	2.56e-06	2.51429e-07	4	3.355e-06	4.06827e-07	4	3.55e-06	2.29674e-07	4	3.1175e-06	4.35093e-07	4	3.3825e-06	7.65075e-07	4	4.115e-06	8.72434e-07	4	5.59e-06	1.53236e-06	4
12	1.83125e-06	3.06121e-07	4	2.05e-06	7.82091e-08	4	2.56e-06	3.02407e-07	4	2.7925e-06	2.35315e-07	4	2.2975e-06	2.84294e-07	4	2.2825e-06	5.118e-07	4	2.5275e-06	6.08884e-07	4	3.74e-06	9.22397e-07	4
12.5	1.694e-06	2.45383e-07	4	1.76e-06	1.1158e-07	4	2.005e-06	2.6244e-07	4	1.9075e-06	9.6296e-08	4	1.7275e-06	5.58831e-08	4	1.9675e-06	5.35341e-07	4	2.195e-06	6.60562e-07	4	2.7775e-06	6.56536e-07	4
13	1.6325e-06	3.02693e-07	4	1.7775e-06	2.54178e-07	4	1.8925e-06	1.42558e-07	4	1.6475e-06	7.1923e-08	4	1.49e-06	9e-08	4	1.7685e-06	4.57397e-07	4	2.08725e-06	7.33689e-07	4	2.235e-06	5.09943e-07	4
13.5	1.8e-06	4.63627e-07	4	2.0575e-06	4.45634e-07	4	2.455e-06	3.39325e-07	4	1.7975e-06	4.02854e-08	4	1.68e-06	2.27303e-08	4	1.725e-06	4.5863e-07	4	2.0915e-06	7.79715e-07	4	2.37e-06	5.54422e-07	4
14	2.055e-06	5.06302e-07	4	2.185e-06	5.36416e-07	4	2.72e-06	4.64812e-07	4	2.0775e-06	1.09345e-07	4	1.7525e-06	1.49304e-08	4	1.7425e-06	3.5563e-07	4	2.21e-06	7.47462e-07	4	2.565e-06	5.60201e-07	4
14.5	1.8325e-06	3.96808e-07	4	1.9525e-06	3.83935e-07	4	2.75e-06	5.1483e-07	4	2.1975e-06	2.3862e-07	4	1.56e-06	3.34166e-08	4	1.6425e-06	4.01277e-07	4	2.055e-06	7.87417e-07	4	2.3575e-06	5.66192e-07	4
15	2.117e-06	5.41946e-07	4	1.8425e-06	4.0623e-07	4	2.5425e-06	4.05203e-07	4	1.98e-06	3.13183e-07	4	1.465e-06	9.50877e-08	4	1.62975e-06	5.12772e-07	4	1.8125e-06	6.83269e-07	4	2.0525e-06	5.0409e-07	4
15.5	1.98175e-06	5.59035e-07	4	1.79e-06	5.0608e-07	4	2.26e-06	3.94229e-07	4	1.64e-06	3.20598e-07	4	1.315e-06	8.68428e-08	4	1.399e-06	3.85704e-07	4	1.6515e-06	5.26544e-07	4	1.7975e-06	4.24429e-07	4
16	1.797e-06	5.13919e-07	4	1.80975e-06	5.73579e-07	4	2.1475e-06	4.80995e-07	4	1.5325e-06	4.21434e-07	4	1.18275e-06	1.5033e-07	4	1.3175e-06	2.87529e-07	4	1.57975e-06	5.42367e-07	4	1.665e-06	5.26284e-07	4
16.5	1.87125e-06	7.32175e-07	4	1.73e-06	5.2863e-07	4	1.9775e-06	4.7736e-07	4	1.7075e-06	4.77884e-07	4	1.11075e-06	1.44396e-07	4	1.17825e-06	2.95066e-07	4	1.33275e-06	5.32502e-07	4	1.433e-06	3.71437e-07	4
17	1.7985e-06	8.54645e-07	4	1.64e-06	5.1168e-07	4	1.7275e-06	4.90125e-07	4	1.506e-06	3.57313e-07	4	9.1025e-07	1.65385e-07	4	9.4525e-07	2.72915e-07	4	1.00925e-06	4.22175e-07	4	1.09025e-06	3.09813e-07	4
17.5	1.6975e-06	8.31194e-07	4	1.6475e-06	4.35285e-07	4	1.6625e-06	4.92974e-07	4	1.301e-06	3.07496e-07	4	6.925e-07	1.29898e-07	4	7.86e-07	2.12297e-07	4	9.665e-07	3.84678e-07	4	1.06175e-06	3.53277e-07	4
18	1.8835e-06	8.36643e-07	4	2.1425e-06	6.80237e-07	4	2.13475e-06	7.35264e-07	4	1.43225e-06	4.35482e-07	4	8.255e-07	1.86522e-07	4	8.4225e-07	2.07128e-07	4	1.0195e-06	4.1801e-07	4	1.24875e-06	4.42613e-07	4
18.5	1.603e-06	5.41402e-07	4	2.19e-06	6.84933e-07	4	2.21075e-06	7.82402e-07	4	1.5755e-06	4.52368e-07	4	9.04e-07	2.01317e-07	4	1.0745e-06	4.28845e-07	4	1.05525e-06	4.94141e-07	4	1.2615e-06	5.60182e-07	4
19	1.44325e-06	4.65395e-07	4	1.71325e-06	5.46129e-07	4	1.593e-06	5.40428e-07	4	1.775e-06	4.37274e-07	4	8.905e-07	1.29013e-07	4	1.42075e-06	7.57062e-07	4	1.271e-06	5.92905e-07	4	1.8425e-06	1.02646e-06	4
19.5	1.2655e-06	4.33814e-07	4	1.2805e-06	4.92839e-07	4	1.8025e-06	6.06097e-07	4	2.2325e-06	4.50932e-07	4	1.995e-06	6.24253e-07	4	2.41175e-06	1.30899e-06	4	2.6585e-06	1.06225e-06	4	4.85025e-06	2.76892e-06	4
20	1.10325e-06	3.95858e-07	4	1.10975e-06	4.48642e-07	4	2.23175e-06	7.32574e-07	4	3.26e-06	7.7053e-07	4	5.04e-06	2.34169e-06	4	5.445e-06	3.27708e-06	4	7.3775e-06	3.42986e-06	4	1.0645e-05	4.98204e-06	4
20.5	9.335e-07	3.04924e-07	4	9.245e-07	3.95762e-07	4	1.39e-06	3.88622e-07	4	1.98e-06	4.13098e-07	4	2.57075e-06	1.16641e-06	4	2.9855e-06	1.79879e-06	4	4.03075e-06	2.09932e-06	4	6.0175e-06	2.60817e-06	4
21	8.76e-07	2.94862e-07	4	6.925e-07	3.16034e-07	4	8.8975e-07	2.75224e-07	4	9.135e-07	1.88702e-07	4	6.5975e-07	1.23912e-07	4	8.9325e-07	5.02502e-07	4	1.15975e-06	6.89684e-07	4	2.0555e-06	8.45323e-07	4
21.5	7.0675e-07	1.97961e-07	4	5.865e-07	2.77054e-07	4	7.9975e-07	2.87983e-07	4	5.625e-07	1.26864e-07	4	4.5575e-07	7.10826e-08	4	5.11e-07	2.7365e-07	4	7.3025e-07	4.44607e-07	4	1.002e-06	4.90693e-07	4
22	5.15e-07	1.21781e-07	4	4.9e-07	2.09707e-07	4	6.12e-07	2.10091e-07	4	4.4e-07	1.46072e-07	4	3.6e-07	5.16478e-08	4	3.8475e-07	1.71785e-07	4	6.83e-07	4.65759e-07	4	7.33e-07	4.0447e-07	4
22.5	4.525e-07	1.01263e-07	4	4.045e-07	1.9677e-07	4	4.8275e-07	1.38427e-07	4	3.5375e-07	1.27533e-07	4	2.875e-07	2.6396e-08	4	3.0475e-07	1.08683e-07	4	5.7525e-07	3.72242e-07	4	5.6975e-07	3.01136e-07	4
23	4.0375e-07	1.00907e-07	4	3.385e-07	1.58702e-07	4	4.42e-07	1.13049e-07	4	3.0325e-07	9.83543e-08	4	2.4075e-07	2.29941e-08	4	2.6e-07	9.73148e-08	4	5.59e-07	2.63396e-07	4	4.675e-07	2.39165e-07	4
23.5	4.2575e-07	1.71303e-07	4	2.925e-07	1.22206e-07	4	4.0425e-07	8.7477e-08	4	2.825e-07	8.36406e-08	4	2.1625e-07	2.83413e-08	4	2.3775e-07	1.00261e-07	4	6.3925e-07	3.39511e-07	4	4.0425e-07	2.14158e-07	4
24	7.5e-07	5.31367e-07	4	2.745e-07	1.11635e-07	4	3.535e-07	7.45883e-08	4	2.6025e-07	8.17633e-08	4	2.305e-07	5.97976e-08	4	2.2455e-07	1.11358e-07	4	4.98e-07	2.61007e-07	4	3.285e-07	1.62624e-07	4
24.5	6.5975e-07	4.33169e-07	4	2.47025e-07	9.74396e-08	4	3.84e-07	8.04746e-08	4	2.27e-07	6.59482e-08	4	3.3925e-07	1.97312e-07	4	2.14475e-07	1.13262e-07	4	3.57e-07	1.4812e-07	4	2.8255e-07	1.30291e-07	4
25	2.64e-07	6.99893e-08	4	2.40975e-07	9.23742e-08	4	3.9675e-07	9.08803e-08	4	2.34e-07	7.37371e-08	4	3.72e-07	2.36058e-07	4	2.1005e-07	1.1678e-07	4	3.3515e-07	1.33985e-07	4	3.20425e-07	1.59922e-07	4
25.5	2.145e-07	3.5453e-08	4	2.86325e-07	1.46213e-07	4	4.24e-07	1.44494e-07	4	2.015e-07	4.88305e-08	4	3.63e-07	2.39158e-07	4	1.886e-07	1.10999e-07	4	2.98775e-07	1.21446e-07	4	5.06725e-07	3.71584e-07	4
26	1.97e-07	3.63479e-08	4	3.4105e-07	2.24795e-07	4	4.0475e-07	1.67424e-07	4	1.7535e-07	3.78337e-08	4	2.33025e-07	1.30565e-07	4	1.507e-07	7.24485e-08	4	2.615e-07	1.05085e-07	4	5.1445e-07	4.08763e-07	4
26.5	1.6365e-07	4.02284e-08	4	3.232e-07	2.22525e-07	4	3.705e-07	1.55376e-07	4	1.556e-07	3.2848e-08	4	9.52e-08	1.49958e-08	4	1.54225e-07	7.82835e-08	4	1.82525e-07	7.77196e-08	4	3.8465e-07	2.65765e-07	4
27	1.42825e-07	3.42133e-08	4	2.722e-07	1.76246e-07	4	2.815e-07	6.95731e-08	4	1.48e-07	3.58562e-08	4	7.8175e-08	4.22855e-09	4	1.7845e-07	1.0639e-07	4	1.39425e-07	7.36281e-08	4	2.07125e-07	9.75667e-08	4
27.5	1.39475e-07	2.59212e-08	4	2.79375e-07	1.88937e-07	4	1.7825e-07	2.85376e-08	4	1.3015e-07	2.73951e-08	4	7.88e-08	9.69355e-09	4	2.777e-07	1.35831e-07	4	1.46525e-07	9.32615e-08	4	1.97375e-07	1.0727e-07	4
28	1.315e-07	2.31535e-08	4	2.7315e-07	1.82232e-07	4	1.55525e-07	3.89098e-08	4	1.19425e-07	2.42434e-08	4	7.895e-08	1.19824e-08	4	4.13875e-07	2.67017e-07	4	1.4995e-07	9.77802e-08	4	2.15975e-07	1.2369e-07	4
28.5	1.2435e-07	1.64009e-08	4	1.76975e-07	9.24657e-08	4	1.442e-07	3.78516e-08	4	1.451e-07	2.25332e-08	4	7.5975e-08	1.17817e-08	4	3.8135e-07	2.29288e-07	4	1.69775e-07	1.15584e-07	4	2.05425e-07	1.11497e-07	4
29	1.2585e-07	1.85173e-08	4	1.137e-07	3.7844e-08	4	1.25325e-07	2.95571e-08	4	2.423e-07	9.37233e-08	4	7.18e-08	7.16147e-09	4	3.65025e-07	1.64625e-07	4	1.7935e-07	1.20066e-07	4	2.43275e-07	1.202e-07	4
29.5	1.27425e-07	1.69788e-08	4	1.0475e-07	3.30394e-08	4	1.26975e-07	2.79303e-08	4	3.62225e-07	2.30258e-07	4	9.925e-08	2.51978e-08	4	4.8775e-07	1.72661e-07	4	2.85325e-07	1.97809e-07	4	4.79525e-07	2.42381e-07	4
30	1.119e-07	1.63669e-08	4	1.05225e-07	3.10797e-08	4	1.19475e-07	2.22821e-08	4	3.6625e-07	2.3844e-07	4	1.7935e-07	7.31769e-08	4	7.14575e-07	3.33738e-07	4	6.37075e-07	4.60153e-07	4	8.5195e-07	4.48e-07	4
Panel B
Light Power	Mean	SEM	N
0	7.99e-06	2.16359e-06	4
0.14	6.3625e-06	6.80507e-07	4
0.43	1.651e-05	4.73981e-06	4
1.1	3.0725e-05	6.68411e-06	4
2.1	8.46e-05	2.4671e-05	4
2.8	0.000124675	4.46364e-05	4
3.3	0.00016275	5.97026e-05	4
3.6	0.0003238	0.000149906	4
Exponential growth equation
Best-fit values
Y0	5.971e-06
k	1.083
Tau	0.9236
Doubling Time	0.6402
95% CI (profile likelihood)
Y0	9.618e-009 to 4.177e-005
k	0.4827 to 2.910
Tau	0.3437 to 2.072
Doubling Time	0.2382 to 1.436
Goodness of Fit
Degrees of Freedom	30
R squared	0.4677
Sum of Squares	3.615e-07
Sy.x	0.0001098
Number of points
# of X values	32
# Y values analyzed	32
Panel C
Light Power	Mean	SEM	N
0	-11.8878	0.345183	4
0.14	-11.9828	0.109467	4
0.43	-11.1189	0.257711	4
1.1	-10.4832	0.266839	4
2.1	-9.6589	0.524459	4
2.8	-9.34879	0.580643	4
3.3	-9.06847	0.563304	4
3.6	-8.54093	0.653309	4
Best-fit values
Slope	0.8827
Y-intercept	-11.75
X-intercept	13.31
1/slope	1.133
Std. Error
Slope	0.109
Y-intercept	0.236
95% Confidence Intervals
Slope	0.6601 to 1.105
Y-intercept	-12.23 to -11.27
X-intercept	10.95 to 17.25
Goodness of Fit
R square	0.6861
Sy.x	0.8397
Is slope significantly non-zero?
F	65.58
DFn, DFd	1, 30
P value	<0.0001
Deviation from zero?	Significant
Replicates test for lack of fit
SD replicates	0.9014
SD lack of fit	0.5244
Discrepancy (F)	0.3385
P value	0.9096
Evidence of inadequate model?	No
Equation	Y = 0.8827*X - 11.75
Data
Number of X values	32
Maximum number of Y replicates	4
Total number of values	32
Number of missing values	0
