# Supplementary material for: Purkinje cell misfiring generates high-amplitude action tremors that are corrected by cerebellar deep brain stimulation
Source: eLife. 2020 Mar 17;9:e51928. doi: 10.7554/eLife.51928 (PMC7077982; doi:10.7554/eLife.51928)
Supplement: Figure 4—source data 1. [file elife-51928-fig4-data1.xlsx]

## Sheet: Sheet1
FIGURE 4
During = During 10Hz stimulation
Post = Post 10Hz stimulation
Pre = Pre 10Hz stimulation
Panel M
Frequency (Hz)	During	Post	Pre
0.5	0.030701	0.004389	0.023496
0.75	0.02111	0.004081	0.014341
1	0.019155	0.0034	0.019903
1.25	0.0218831	0.00385063	0.0150452
1.5	0.018591	0.002756	0.011725
1.75	0.015029	0.002599	0.013042
2	0.019061	0.003101	0.015888
2.25	0.020639	0.009374	0.020099
2.5	0.023448	0.012347	0.012106
2.75	0.02701	0.005685	0.011976
3	0.018932	0.002798	0.008986
3.25	0.01106	0.002685	0.006903
3.5	0.010428	0.002433	0.006167
3.75	0.012432	0.002548	0.005287
4	0.013419	0.003222	0.004999
4.25	0.008986	0.002984	0.008111
4.5	0.008242	0.002567	0.009289
4.75	0.009785	0.002333	0.007728
5	0.007715	0.001707	0.007824
5.25	0.008612	0.001291	0.00956
5.5	0.00594	0.001263	0.008277
5.75	0.009199	0.001015	0.008463
6	0.013518	0.000842	0.007594
6.25	0.01854	0.000696	0.006645
6.5	0.017546	0.001074	0.00676
6.75	0.014894	0.001198	0.008845
7	0.016363	0.001837	0.00858
7.25	0.013654	0.002184	0.011713
7.5	0.016136	0.001687	0.014067
7.75	0.019311	0.001617	0.008069
8	0.019636	0.001214	0.006921
8.25	0.018116	0.001393	0.008069
8.5	0.013979	0.002308	0.007017
8.75	0.014004	0.001633	0.011416
9	0.015555	0.001213	0.010104
9.25	0.022595	0.000683	0.006744
9.5	0.03338	0.001004	0.005723
9.75	0.211647	0.001143	0.004033
10	1	0.001028	0.004397
10.25	0.447535	0.00122	0.004823
10.5	0.062538	0.001494	0.006203
10.75	0.029289	0.001148	0.007107
11	0.023479	0.000899	0.007308
11.25	0.015648	0.000621	0.006706
11.5	0.01223	0.000309	0.00452
11.75	0.012688	0.000326	0.004629
12	0.013013	0.000437	0.004316
12.25	0.010583	0.000572	0.004475
12.5	0.008183	0.00064	0.003619
12.75	0.007591	0.000707	0.003608
13	0.007539	0.000707	0.003365
13.25	0.006681	0.000821	0.003096
13.5	0.00745	0.000656	0.002575
13.75	0.006705	0.00058	0.002119
14	0.009744	0.000433	0.003669
14.25	0.013703	0.000339	0.00352
14.5	0.009473	0.000348	0.004024
14.75	0.008387	0.000425	0.004901
15	0.006717	0.000458	0.003568
15.25	0.006677	0.000511	0.002004
15.5	0.006857	0.00046	0.003576
15.75	0.006759	0.000346	0.003939
16	0.007692	0.000294	0.002723
16.25	0.006679	0.000254	0.00293
16.5	0.008045	0.000346	0.00244
16.75	0.008332	0.000266	0.003363
17	0.004983	0.000235	0.003292
17.25	0.004516	0.000401	0.003198
17.5	0.006252	0.000366	0.002993
17.75	0.005358	0.000365	0.002532
18	0.005238	0.000167	0.002088
18.25	0.005563	0.000367	0.002049
18.5	0.005545	0.000568	0.002096
18.75	0.005238	0.000458	0.001952
19	0.004857	0.000333	0.001754
19.25	0.006952	0.000403	0.001204
19.5	0.007426	0.000633	0.001204
19.75	0.015883	0.000573	0.001515
20	0.059863	0.000409	0.001089
During = During 10Hz stimulation
Post = Post 10Hz stimulation
Pre = Pre 10Hz stimulation
Panel N
Pre	During	Post
0.161196	1	0.0552826
0.346947	1	0.37665
0.00827	1	0.0159608
0.00439718	1	0.00102762
0.284627	1	0.562007
0.167051	1	0.159408
0.305003	1	0.0211834
Panel O
	Stimulation Frequency (Hz)
EMG Frequency (Hz)	1			2			3			4			5			6			7			8			9			10			11			12			13			14			15			16			17
	Mean	SEM	N	Mean	SEM	N	Mean	SEM	N	Mean	SEM	N	Mean	SEM	N	Mean	SEM	N	Mean	SEM	N	Mean	SEM	N				Mean	SEM	N	Mean	SEM	N	Mean	SEM	N	Mean	SEM	N	Mean	SEM	N	Mean	SEM	N	Mean	SEM	N	Mean
0.5	1.59442	0.560233	7	1.27198	0.375467	6	1.7011	0.741296	7	1.30926	0.463995	6	3.78847	2.30128	8	2.73143	1.04055	6	1.47747	0.302163	7	2.20789	0.380797	7	1.20106	0.263809	7	2.40642	0.919637	8	1.22158	0.358096	7	1.41972	0.547727	7	1.18526	0.502936	6	1.34122	0.419464	6	0.794165	0.332891	6	0.525457	0.187391	6	1.04329
0.75	2.86232	0.603097	7	1.66687	0.508714	6	1.86455	0.889829	7	1.13475	0.312946	6	3.59962	2.10576	8	2.24956	0.697432	6	2.47709	0.920514	7	2.19298	0.509745	7	1.28101	0.293428	7	1.95907	0.833858	8	1.04851	0.258532	7	1.51936	0.722203	7	1.27833	0.496443	6	1.43932	0.451416	6	0.616142	0.240207	6	0.60115	0.234539	6	1.55211
1	7.11506	1.39691	7	1.33221	0.236706	6	2.28302	1.08412	7	1.37544	0.650995	6	3.42254	1.84451	8	2.05586	0.603951	6	2.2296	0.951479	7	2.05281	0.580072	7	1.27432	0.197477	7	1.66159	0.676268	8	1.23253	0.315541	7	1.51078	0.686396	7	1.05945	0.348706	6	1.29558	0.368453	6	0.635874	0.306626	6	0.629773	0.200329	6	1.91438
1.25	4.09259	1.15414	7	1.65852	0.474986	6	3.03934	1.70582	7	1.12577	0.318336	6	3.0676	1.43561	8	1.91649	0.421972	6	3.08306	1.89389	7	1.90726	0.538891	7	1.35906	0.232139	7	1.63756	0.627533	8	1.23578	0.34592	7	1.38454	0.62675	7	1.0315	0.372539	6	1.12772	0.269558	6	0.671107	0.343911	6	0.716653	0.291874	6	1.4224
1.5	2.67786	0.966924	7	2.08641	0.655838	6	2.41575	1.01963	7	1.16647	0.332774	6	3.10657	1.51511	8	1.90833	0.330053	6	3.27885	1.74712	7	1.76762	0.418179	7	1.31532	0.245655	7	2.05679	1.01692	8	1.30744	0.37269	7	1.49526	0.787895	7	1.04222	0.360914	6	1.43365	0.360771	6	0.574523	0.264365	6	0.588128	0.1849	6	1.14147
1.75	3.1163	1.24726	7	3.46931	1.30072	6	3.23362	1.73616	7	1.42949	0.685856	6	3.30711	1.68333	8	2.26078	0.350998	6	2.56393	1.1395	7	1.77228	0.498937	7	1.60535	0.302113	7	2.04005	1.03749	8	1.52373	0.450351	7	2.05095	1.30712	7	0.959143	0.275476	6	1.38617	0.294631	6	0.445995	0.193744	6	0.536557	0.210167	6	1.1959
2	4.28824	1.56354	7	9.01533	4.33072	6	3.46277	1.98545	7	1.33504	0.574305	6	2.87844	1.21188	8	1.94236	0.271703	6	2.4448	1.36903	7	2.04189	0.639941	7	1.66137	0.424851	7	1.74195	0.662459	8	1.34816	0.406638	7	1.56531	1.02021	7	0.993137	0.347703	6	1.3229	0.37038	6	0.444929	0.216334	6	0.591735	0.205669	6	1.09596
2.25	3.13227	1.15402	7	3.91838	1.77985	6	3.34823	1.85083	7	2.19091	1.27708	6	2.31391	0.966293	8	1.56417	0.244469	6	2.3769	1.19131	7	2.03407	0.607928	7	1.3582	0.264315	7	1.41321	0.413541	8	1.31681	0.371328	7	1.22913	0.659925	7	0.803952	0.238132	6	1.40463	0.390537	6	0.48165	0.216612	6	0.762862	0.239334	6	1.29887
2.5	2.84292	1.03742	7	2.66495	1.2007	6	6.01323	4.4758	7	2.33502	1.33515	6	2.37798	1.03321	8	1.56349	0.235564	6	2.13169	0.419105	7	1.70755	0.492855	7	1.28319	0.170058	7	1.43233	0.407379	8	1.20812	0.308908	7	0.899383	0.334786	7	0.891423	0.218352	6	1.48539	0.404607	6	0.46138	0.168715	6	0.943279	0.268098	6	2.14405
2.75	4.60389	2.05896	7	2.66943	1.1559	6	8.76053	4.99707	7	1.88245	0.657848	6	2.71685	1.16154	8	1.8857	0.278081	6	2.06479	0.416162	7	1.24383	0.368722	7	1.32009	0.200276	7	1.63643	0.527666	8	1.17366	0.26152	7	0.829515	0.246019	7	0.87635	0.200851	6	1.61265	0.418677	6	0.619234	0.265325	6	0.884114	0.26502	6	3.15007
3	5.80431	2.45428	7	2.1171	0.897553	6	11.6248	3.15152	7	1.883	0.644849	6	2.94263	1.12387	8	2.12983	0.39001	6	2.05418	0.451967	7	1.17522	0.318013	7	1.2753	0.163945	7	1.62904	0.43849	8	1.30784	0.278649	7	1.02443	0.393678	7	0.865565	0.194768	6	1.8106	0.40658	6	0.678252	0.301883	6	0.692056	0.211304	6	2.75438
3.25	4.25912	1.3578	7	2.16288	0.919402	6	6.24031	1.60145	7	2.08382	0.807507	6	2.63511	0.86186	8	2.27392	0.256079	6	2.32769	0.595776	7	1.16016	0.294998	7	1.46453	0.240683	7	1.22436	0.29408	8	1.3806	0.273659	7	1.12495	0.491429	7	0.856012	0.199767	6	1.59094	0.328571	6	0.709885	0.319637	6	0.726643	0.23284	6	2.20724
3.5	4.31934	1.37693	7	2.2287	0.965139	6	3.59891	1.33617	7	2.29815	1.03618	6	2.75695	1.03444	8	2.30902	0.264711	6	2.60519	0.979449	7	1.2547	0.224189	7	1.54772	0.27071	7	1.17857	0.271962	8	1.47476	0.358421	7	0.93688	0.30133	7	0.782239	0.220699	6	1.39233	0.404365	6	0.905071	0.494132	6	0.724655	0.263995	6	2.0534
3.75	4.4835	1.65721	7	2.71342	1.10022	6	3.47526	1.57141	7	5.59439	1.98861	6	2.5485	0.857382	8	2.23446	0.292522	6	1.73781	0.356955	7	1.46619	0.224931	7	1.25486	0.240842	7	1.41399	0.356273	8	1.58164	0.391332	7	0.899124	0.307245	7	0.854331	0.214207	6	1.32514	0.435898	6	0.903581	0.462255	6	0.809909	0.318599	6	1.60698
4	4.57467	1.42646	7	4.28081	2.25337	6	3.06576	1.31966	7	13.0533	5.70251	6	2.6206	0.990484	8	2.13161	0.168196	6	1.6479	0.217654	7	1.36004	0.23226	7	1.10654	0.244034	7	1.42569	0.371847	8	1.51828	0.364122	7	0.712494	0.238642	7	0.911675	0.253609	6	1.16941	0.343498	6	0.843372	0.390792	6	0.841992	0.299816	6	1.3833
4.25	3.48242	1.1809	7	2.65342	1.13297	6	3.09574	1.30462	7	7.16496	2.39501	6	2.89409	1.0795	8	2.1917	0.19705	6	1.77852	0.308944	7	1.3368	0.325512	7	1.29987	0.265357	7	1.61073	0.413758	8	1.23291	0.282804	7	0.642738	0.213843	7	1.00851	0.264574	6	1.33201	0.376529	6	0.804767	0.387758	6	0.860538	0.349992	6	1.38616
4.5	3.0964	1.18966	7	1.96276	0.773624	6	2.46499	0.762537	7	3.64109	1.53133	6	2.86889	0.795827	8	2.26015	0.285825	6	2.71102	1.07826	7	1.27491	0.376456	7	1.31863	0.229206	7	1.41602	0.336246	8	1.2202	0.336411	7	0.650336	0.187549	7	1.12309	0.281917	6	1.44332	0.425746	6	0.797228	0.413266	6	0.868844	0.329044	6	1.12818
4.75	3.4115	1.4592	7	2.34583	1.14391	6	2.20596	0.410446	7	3.38929	1.65492	6	6.04319	1.98132	8	2.11511	0.323374	6	2.7506	0.942914	7	1.1792	0.233031	7	1.6935	0.229439	7	1.30457	0.297861	8	1.44561	0.467339	7	0.67072	0.204052	7	1.11764	0.278528	6	1.60059	0.542319	6	0.764041	0.428993	6	0.980869	0.376709	6	1.06007
5	4.62224	1.98644	7	2.39314	1.00512	6	2.9081	0.894921	7	3.01928	1.43215	6	18.8877	7.71513	8	2.24064	0.259572	6	2.50744	0.564039	7	1.38138	0.256976	7	2.06825	0.39031	7	1.52398	0.407278	8	1.4228	0.379003	7	0.686032	0.186073	7	0.977837	0.236999	6	1.56165	0.548595	6	0.650227	0.278594	6	1.01802	0.381544	6	1.60079
5.25	4.30136	1.78107	7	2.36433	0.912753	6	4.35415	2.45963	7	2.79515	1.35073	6	8.49408	3.01257	8	2.9637	0.453769	6	2.75303	0.686056	7	1.5373	0.264237	7	1.88999	0.280244	7	1.56226	0.359423	8	1.53231	0.400196	7	0.775358	0.192175	7	1.02296	0.253958	6	1.51622	0.497059	6	0.948714	0.404437	6	1.14729	0.434187	6	1.398
5.5	3.79262	1.51092	7	2.275	0.855334	6	3.99989	2.14447	7	2.2991	1.02828	6	3.0194	0.779732	8	3.80978	0.948508	6	2.39017	0.5343	7	1.69112	0.4412	7	1.94969	0.254119	7	1.54712	0.276612	8	1.5335	0.452935	7	0.976914	0.243104	7	1.22464	0.380183	6	1.41232	0.353325	6	1.14259	0.5166	6	0.987383	0.353785	6	1.15559
5.75	3.73761	1.30631	7	2.19201	0.983237	6	3.01297	0.88154	7	2.33695	1.06633	6	2.65774	0.812036	8	11.2099	5.09895	6	3.08653	0.706094	7	1.62043	0.400308	7	2.16608	0.383241	7	1.63517	0.204994	8	1.26399	0.383276	7	0.90077	0.23179	7	1.18458	0.392167	6	1.32432	0.33816	6	1.1685	0.678046	6	0.816605	0.282165	6	1.33636
6	3.61632	1.14484	7	4.31665	2.44233	6	3.81138	0.805279	7	3.18595	1.81421	6	2.47803	0.817244	8	28.4652	16.0579	6	3.13161	0.65212	7	1.45645	0.344023	7	1.75655	0.219015	7	1.85441	0.494829	8	1.20352	0.387074	7	0.882292	0.213471	7	1.05747	0.30296	6	1.62192	0.503167	6	1.60831	1.20054	6	0.935715	0.314328	6	1.73732
6.25	3.60442	1.10611	7	2.85634	1.36741	6	3.23713	0.896296	7	2.0633	0.808765	6	2.37314	0.740112	8	11.7917	4.66999	6	2.95077	0.63065	7	1.62527	0.452103	7	1.61615	0.306293	7	1.93175	0.555068	8	1.4864	0.389018	7	0.946889	0.25298	7	1.28818	0.360293	6	1.59949	0.542229	6	2.05274	1.57525	6	0.796048	0.242729	6	1.32144
6.5	3.38298	1.02238	7	2.23127	0.926609	6	3.14178	1.05165	7	2.07178	0.963017	6	2.40826	0.707752	8	4.72259	1.59775	6	3.29511	0.786526	7	1.83415	0.537243	7	1.51804	0.290051	7	1.38481	0.475946	8	1.66875	0.438409	7	1.08895	0.304023	7	1.51619	0.648558	6	1.37886	0.418763	6	1.63414	1.15489	6	0.784995	0.24319	6	1.26334
6.75	2.97456	0.887383	7	2.21171	0.922492	6	3.06552	1.32843	7	2.2091	1.32155	6	2.35544	0.735053	8	4.11479	1.89357	6	7.2637	2.21403	7	1.87577	0.526456	7	1.37292	0.277224	7	1.33319	0.358627	8	1.55728	0.357678	7	1.04774	0.250183	7	1.18868	0.454301	6	1.26658	0.386555	6	1.48587	1.09424	6	0.845996	0.271326	6	1.34307
7	3.11335	1.05208	7	2.0541	0.805819	6	3.0954	1.03096	7	1.82425	0.893957	6	2.1626	0.688773	8	3.18514	0.875543	6	21.925	8.45802	7	1.6519	0.351898	7	1.56505	0.37276	7	1.39677	0.344503	8	1.68244	0.393021	7	1.00368	0.253179	7	1.04917	0.297687	6	1.28527	0.328973	6	1.76448	1.34853	6	0.863247	0.270561	6	1.32649
7.25	2.88318	0.960215	7	1.98329	0.704647	6	3.22749	1.14522	7	1.74252	0.830977	6	1.87357	0.703296	8	3.07366	0.68813	6	11.1806	3.83639	7	2.14658	0.508508	7	1.53284	0.350006	7	1.24476	0.17658	8	1.98703	0.502163	7	1.19188	0.327645	7	1.02369	0.252283	6	1.43429	0.371031	6	1.25231	0.794806	6	0.860031	0.331361	6	1.1633
7.5	2.86991	0.978829	7	2.12253	0.707405	6	2.94457	0.939026	7	1.53981	0.66608	6	1.72599	0.652988	8	3.07583	0.708247	6	3.75386	0.768321	7	2.70402	0.653496	7	1.9011	0.382049	7	1.58364	0.256801	8	2.00964	0.483812	7	1.22913	0.337923	7	1.10758	0.244832	6	1.50163	0.440946	6	1.10181	0.608114	6	0.860709	0.290389	6	1.05389
7.75	3.32324	1.07982	7	2.55289	0.887776	6	2.52781	0.660258	7	2.06947	0.68154	6	1.76437	0.653584	8	2.52298	0.4937	6	2.924	0.415046	7	7.94733	3.31694	7	2.09492	0.379605	7	1.77881	0.380467	8	1.83639	0.40709	7	1.28119	0.283816	7	1.14625	0.284038	6	1.46539	0.432043	6	1.5037	1.01018	6	0.781345	0.290073	6	1.08442
8	3.39943	1.03582	7	2.90048	1.01591	6	2.77841	0.737912	7	4.63699	1.87565	6	1.74922	0.644945	8	2.25015	0.425016	6	2.65058	0.20639	7	31.0395	16.9062	7	2.19294	0.397007	7	2.01827	0.47158	8	1.83722	0.387262	7	1.25113	0.225964	7	1.04786	0.247074	6	1.51521	0.378898	6	1.88332	1.30363	6	0.966317	0.461226	6	1.13808
8.25	2.97122	0.81907	7	1.97613	0.589054	6	3.10362	1.10846	7	2.55188	0.793897	6	1.43821	0.512252	8	2.53377	0.555869	6	2.77733	0.332362	7	16.373	8.78226	7	2.76501	0.569224	7	1.87477	0.346004	8	1.89329	0.381697	7	1.39087	0.287273	7	1.03411	0.26342	6	1.83649	0.536611	6	1.57036	0.909514	6	0.795392	0.314973	6	0.985537
8.5	2.67096	0.46907	7	1.55525	0.32231	6	3.31947	1.16972	7	1.01181	0.246581	6	1.46629	0.609312	8	2.38406	0.493715	6	2.61167	0.236467	7	3.92809	1.25726	7	4.03583	1.03803	7	1.52573	0.27379	8	1.74993	0.374295	7	1.23193	0.308266	7	1.1131	0.275812	6	1.72651	0.465962	6	1.38815	0.665894	6	0.690201	0.254695	6	1.05878
8.75	2.55151	0.379199	7	1.33503	0.3487	6	3.9964	1.43235	7	0.816899	0.254641	6	1.63497	0.647866	8	1.99327	0.372127	6	2.74594	0.282394	7	2.94427	0.767533	7	9.44549	4.0635	7	1.43511	0.267325	8	1.78836	0.444566	7	1.08171	0.26193	7	1.45712	0.215245	6	1.51276	0.404922	6	1.41238	0.684669	6	0.712843	0.249566	6	0.938123
9	2.26742	0.472196	7	1.19675	0.2976	6	4.21635	1.3588	7	0.722772	0.255806	6	1.68745	0.506729	8	2.06239	0.536333	6	2.43265	0.365583	7	2.09206	0.416812	7	35.6206	19.1908	7	1.62163	0.345832	8	1.80914	0.425269	7	1.06928	0.28257	7	1.60957	0.239433	6	1.4798	0.361292	6	1.47155	0.810235	6	0.798479	0.266969	6	1.09676
9.25	2.53082	0.556946	7	1.29275	0.360434	6	4.15347	1.43722	7	0.873971	0.30159	6	1.56072	0.46977	8	2.07023	0.405285	6	1.91532	0.347111	7	2.18214	0.475232	7	19.1823	10.9484	7	2.23007	0.668549	8	2.12064	0.600079	7	0.969347	0.274958	7	1.38653	0.252906	6	1.43685	0.337044	6	1.40112	0.795604	6	0.965336	0.356126	6	1.48374
9.5	2.58043	0.515768	7	1.17209	0.270374	6	3.28379	1.07711	7	0.964276	0.325142	6	1.53801	0.417745	8	2.09323	0.266591	6	1.65511	0.35601	7	2.24494	0.55108	7	4.59915	1.692	7	2.852	1.10171	8	1.80559	0.563246	7	0.963916	0.268773	7	1.38114	0.300672	6	1.50408	0.336801	6	0.91204	0.356054	6	0.868527	0.292901	6	1.33267
9.75	2.78872	0.540501	7	1.08667	0.309254	6	2.31653	0.643034	7	0.716084	0.250178	6	2.05762	0.657699	8	1.92841	0.319406	6	1.62983	0.381192	7	2.49465	0.490267	7	3.62493	0.893522	7	13.7934	9.86078	8	1.51905	0.406399	7	1.14618	0.348126	7	1.21449	0.309022	6	1.64298	0.201209	6	0.790757	0.355481	6	0.841073	0.279723	6	1.25581
10	2.6807	0.359904	7	1.60241	0.656089	6	1.93692	0.620873	7	0.749862	0.2714	6	4.79257	2.37585	8	2.12385	0.316279	6	1.70641	0.337118	7	2.38708	0.439827	7	3.09368	0.664094	7	59.6261	45.2105	8	2.05775	0.592995	7	1.70712	0.848524	7	1.04759	0.276673	6	1.79575	0.227072	6	0.773664	0.379598	6	0.9947	0.4754	6	1.18419
10.25	2.35884	0.482078	7	1.54367	0.717329	6	1.70598	0.363138	7	1.02772	0.364825	6	3.6842	1.60381	8	1.98494	0.183133	6	1.76174	0.4459	7	1.85497	0.302762	7	3.30976	0.83327	7	26.2533	17.7747	8	3.55852	1.61107	7	2.7296	1.75522	7	1.26277	0.452807	6	1.54624	0.249376	6	0.684685	0.313724	6	0.836672	0.350525	6	1.09452
10.5	2.18672	0.507001	7	1.8	0.859807	6	2.32111	0.996122	7	1.1687	0.394815	6	2.21315	0.606624	8	2.26888	0.341302	6	1.89908	0.58371	7	2.05535	0.380782	7	3.49413	0.938475	7	4.74969	1.92245	8	3.44106	1.38576	7	3.00787	1.88684	7	1.5089	0.680001	6	1.2721	0.256233	6	1.04673	0.435821	6	0.758906	0.266675	6	1.13989
10.75	1.9781	0.598051	7	1.79433	0.980777	6	2.34969	1.25417	7	1.03273	0.344198	6	2.50203	0.703281	8	2.41847	0.468659	6	1.58225	0.199637	7	2.14672	0.472321	7	2.37734	0.49471	7	2.53041	0.728666	8	10.1194	5.94517	7	1.34912	0.449856	7	1.14072	0.394461	6	1.21427	0.333357	6	1.3439	0.553181	6	0.947522	0.484876	6	1.11253
11	1.6405	0.440576	7	1.37138	0.505097	6	2.5315	1.31082	7	1.37059	0.403276	6	2.56209	0.735565	8	2.79828	0.516221	6	1.96607	0.341397	7	2.27854	0.545205	7	2.25553	0.525557	7	2.11218	0.548545	8	42.3548	28.3878	7	1.13003	0.438898	7	1.09578	0.427703	6	0.882973	0.197785	6	1.28837	0.481256	6	0.94349	0.46486	6	1.09787
11.25	1.37536	0.284471	7	1.22782	0.381839	6	2.86632	1.31248	7	1.34637	0.354935	6	2.46128	0.719203	8	3.31422	0.908044	6	2.08613	0.399467	7	2.03741	0.594162	7	2.19984	0.619771	7	2.01316	0.45891	8	21.1144	14.4828	7	1.28371	0.537566	7	1.46442	0.55997	6	0.967703	0.199936	6	1.23683	0.433741	6	0.816845	0.326615	6	1.04349
11.5	1.51553	0.480794	7	1.15447	0.383654	6	3.43535	1.28876	7	1.40464	0.338178	6	2.37555	0.882575	8	4.03213	1.34351	6	1.98916	0.312817	7	1.92248	0.580369	7	2.25329	0.72974	7	2.14514	0.548234	8	3.01317	1.13805	7	1.67591	0.650589	7	1.76276	0.76718	6	1.36109	0.363426	6	1.34388	0.514077	6	1.05134	0.395622	6	0.991403
11.75	2.5059	1.40702	7	1.2093	0.520162	6	3.69066	1.30612	7	1.74016	0.549756	6	2.32819	0.663128	8	6.00466	2.50086	6	2.06338	0.484302	7	1.77545	0.501849	7	2.69602	1.03703	7	1.99715	0.511228	8	4.38718	1.49338	7	5.25416	2.61112	7	1.7175	0.754374	6	1.41659	0.339654	6	1.3379	0.588667	6	1.33363	0.424225	6	1.26794
12	2.34804	1.16466	7	1.17465	0.611392	6	4.03385	1.3299	7	2.16832	0.602197	6	2.23141	0.606305	8	18.6936	11.4436	6	2.23695	0.577365	7	1.51665	0.443914	7	2.34331	0.803494	7	1.90068	0.603736	8	3.78499	1.31853	7	27.0537	14.9119	7	1.63965	0.755092	6	1.36699	0.253668	6	1.01602	0.523086	6	1.40989	0.348829	6	1.34108
12.25	2.15733	1.05416	7	1.05959	0.487742	6	4.06397	1.26433	7	2.2757	0.566718	6	2.61501	0.682966	8	8.61051	4.18363	6	2.16969	0.80936	7	1.44921	0.451928	7	2.05107	0.696752	7	1.56457	0.462614	8	3.12452	0.864977	7	13.9559	6.86565	7	1.97453	1.10667	6	1.46291	0.341647	6	1.04155	0.563032	6	1.40762	0.321247	6	1.09965
12.5	2.28488	0.977532	7	1.33388	0.459198	6	3.52531	0.944203	7	2.28646	0.59296	6	3.2547	0.995979	8	2.47259	0.603794	6	2.12561	0.87283	7	1.60618	0.525722	7	2.31313	0.931783	7	1.51041	0.426032	8	2.49129	0.572852	7	2.25843	0.755058	7	2.73048	1.63198	6	1.5437	0.409412	6	1.1099	0.44574	6	1.17028	0.272535	6	1.33207
12.75	2.90722	1.09651	7	1.50592	0.503884	6	3.74621	1.24315	7	2.02084	0.404495	6	3.26059	1.3163	8	2.15683	0.646407	6	2.30037	0.822629	7	1.60209	0.606167	7	2.27531	0.828216	7	1.42952	0.371428	8	2.18223	0.486498	7	1.88275	0.479766	7	7.74142	5.65515	6	1.61093	0.416203	6	1.2281	0.55575	6	0.99525	0.179244	6	1.53552
13	2.85831	1.10049	7	1.48469	0.389215	6	3.84949	1.48037	7	1.95229	0.415248	6	2.53121	0.788752	8	2.01749	0.64502	6	2.2845	0.937744	7	1.5325	0.454494	7	1.70931	0.493634	7	1.60401	0.466063	8	2.18655	0.448446	7	1.94121	0.454412	7	30.9004	25.2611	6	1.79218	0.589088	6	1.23967	0.72687	6	1.00155	0.197412	6	1.40406
13.25	2.75772	1.03667	7	1.50709	0.389714	6	3.1683	1.18722	7	1.88467	0.482674	6	2.71708	0.762099	8	1.96031	0.579913	6	2.14307	0.710976	7	1.52964	0.411793	7	1.72485	0.621457	7	1.52128	0.475567	8	2.37632	0.400872	7	1.7918	0.428422	7	15.7095	11.8782	6	1.90186	0.673563	6	1.11862	0.669705	6	1.13659	0.278667	6	1.46511
13.5	2.71215	0.990724	7	1.35358	0.362443	6	3.23434	1.32508	7	1.69848	0.46237	6	2.7047	0.855794	8	2.19479	0.626968	6	2.48352	0.618722	7	1.85434	0.528223	7	1.92822	0.772634	7	1.81039	0.518431	8	2.76699	0.602397	7	1.41043	0.269511	7	2.33338	1.10246	6	2.27944	0.73308	6	1.47599	0.866805	6	1.2442	0.39876	6	1.697
13.75	2.97684	1.14813	7	1.11318	0.22669	6	2.65769	0.940495	7	2.14619	0.666214	6	2.46244	0.703443	8	2.59477	1.05918	6	4.53397	1.91729	7	1.93745	0.536543	7	1.82866	0.625179	7	1.89558	0.540738	8	2.63393	0.717515	7	1.286	0.248567	7	1.81967	0.850938	6	5.29244	2.52917	6	1.77812	1.01442	6	1.13901	0.480955	6	1.73972
14	3.35899	1.32199	7	1.29992	0.305819	6	2.67767	1.05402	7	2.1412	0.860245	6	2.29591	0.643493	8	2.38031	0.890926	6	9.58356	5.29607	7	2.13006	0.617452	7	1.81918	0.565581	7	1.89286	0.50982	8	2.26771	0.622751	7	1.1169	0.261135	7	1.45836	0.496467	6	23.3599	16.4974	6	1.84395	1.0105	6	1.12687	0.466213	6	1.64947
14.25	3.29625	1.12319	7	1.72364	0.463518	6	3.01138	1.19933	7	1.88496	0.715266	6	2.16435	0.60212	8	1.9716	0.492152	6	5.97707	2.74051	7	2.0558	0.560069	7	1.62469	0.485203	7	2.22394	0.795986	8	2.46462	0.67229	7	1.30839	0.327271	7	1.68997	0.517747	6	15.4481	7.78922	6	2.48888	1.59087	6	1.02734	0.437634	6	1.22691
14.5	3.27325	1.02234	7	1.77192	0.59953	6	3.19149	1.16803	7	1.82559	0.696609	6	1.80048	0.501934	8	1.7928	0.392326	6	3.38505	0.982019	7	1.80914	0.44481	7	1.94079	0.524462	7	1.9596	0.520694	8	2.72962	0.80937	7	1.51877	0.380871	7	1.69384	0.57785	6	3.43365	1.02072	6	2.47065	1.34458	6	1.19185	0.508753	6	1.25006
14.75	3.06028	0.861313	7	1.86608	0.64248	6	3.84264	1.61618	7	1.67873	0.728827	6	1.7739	0.597443	8	1.94676	0.442473	6	3.55601	1.12533	7	1.68912	0.367813	7	2.12942	0.515702	7	1.73432	0.400352	8	2.42324	0.683123	7	1.53208	0.386081	7	1.47576	0.490548	6	2.38074	0.577266	6	5.43941	3.3884	6	1.34038	0.578827	6	1.71225
15	3.15973	0.889713	7	1.68207	0.487033	6	4.20352	1.28164	7	1.72169	0.850465	6	2.8195	1.25193	8	2.61304	0.774295	6	2.82664	0.83414	7	1.70409	0.380692	7	2.06035	0.433371	7	1.83354	0.435459	8	2.15036	0.624822	7	1.38239	0.351776	7	1.55934	0.425192	6	2.20439	0.425186	6	29.6089	24.9161	6	1.46824	0.655951	6	1.88841
15.25	2.86729	0.7719	7	1.52095	0.438638	6	3.62177	1.17445	7	1.60144	0.725083	6	2.12979	0.834196	8	2.57092	0.672877	6	2.64735	0.508023	7	2.2788	0.493708	7	1.9558	0.412026	7	2.3812	0.632467	8	1.97065	0.496417	7	1.52536	0.403718	7	1.67059	0.453425	6	2.20062	0.521792	6	18.3046	14.0448	6	1.58822	0.735324	6	2.11292
15.5	2.87649	0.671464	7	1.504	0.422689	6	4.12021	1.43506	7	1.68795	0.64406	6	1.72114	0.58349	8	2.17143	0.429565	6	2.56719	0.384073	7	2.67241	0.513598	7	1.93398	0.431942	7	1.93079	0.417477	8	2.07644	0.598363	7	1.30792	0.33272	7	1.60749	0.410859	6	2.18806	0.610444	6	3.18155	1.68896	6	1.2879	0.54429	6	2.24522
15.75	2.7234	0.593537	7	1.42747	0.396217	6	3.7559	1.31874	7	1.90282	0.701849	6	1.39705	0.433593	8	2.18425	0.470938	6	2.58331	0.335331	7	4.40245	1.3234	7	2.04221	0.427425	7	1.65971	0.336685	8	2.10058	0.554718	7	1.25077	0.340716	7	1.48889	0.390737	6	2.63017	0.836947	6	3.25097	1.80977	6	2.98879	1.55411	6	1.91399
16	2.69546	0.490504	7	1.49267	0.49465	6	3.72393	1.35408	7	2.557	0.767655	6	1.37825	0.42878	8	2.09371	0.46477	6	2.60515	0.514233	7	10.8173	4.2375	7	2.41358	0.488628	7	2.0421	0.537138	8	1.81081	0.519266	7	1.34508	0.35472	7	1.58945	0.421886	6	2.56993	0.748633	6	2.49641	1.22244	6	12.7558	7.39396	6	1.81777
16.25	2.69187	0.399879	7	1.21542	0.303699	6	4.49689	2.17166	7	2.09056	0.515517	6	1.71851	0.497675	8	1.92321	0.361673	6	2.1274	0.310474	7	8.05384	3.06776	7	2.80993	0.538248	7	1.98057	0.436001	8	1.9348	0.536135	7	1.35871	0.351827	7	1.51228	0.413595	6	2.4225	0.652198	6	2.59099	1.14165	6	7.01401	3.87848	6	2.34819
16.5	2.43589	0.290626	7	1.28101	0.173232	6	4.34348	1.87042	7	1.47186	0.437327	6	1.94532	0.619451	8	1.95564	0.461905	6	2.40039	0.352096	7	3.20197	0.873522	7	2.87575	0.600241	7	2.03757	0.588918	8	2.71946	0.862482	7	1.46359	0.391641	7	1.4093	0.3548	6	2.06793	0.424778	6	2.36503	0.999752	6	1.73857	0.839208	6	3.34608
16.75	2.21464	0.185163	7	1.43699	0.298587	6	3.73068	1.38503	7	1.19215	0.348538	6	1.689	0.479642	8	1.70445	0.291323	6	2.80329	0.49623	7	2.23203	0.457437	7	2.79669	0.601852	7	1.94703	0.440845	8	2.19842	0.596085	7	1.36492	0.353687	7	1.32962	0.294567	6	1.57557	0.26239	6	1.83266	0.781087	6	1.37022	0.635009	6	6.33719
17	2.25724	0.24096	7	1.81278	0.401322	6	3.38945	1.00495	7	0.991765	0.285872	6	1.46656	0.422869	8	1.9099	0.288018	6	2.23056	0.276924	7	1.94621	0.391314	7	2.98493	0.688882	7	1.65575	0.257933	8	1.92753	0.432336	7	1.22536	0.317867	7	1.27824	0.274991	6	1.30435	0.191046	6	1.91976	0.832716	6	1.25399	0.544484	6	20.397
17.25	2.24329	0.207178	7	2.02634	0.644476	6	2.95197	0.839718	7	1.10628	0.395808	6	1.55363	0.403354	8	2.19887	0.380729	6	2.21822	0.268467	7	1.86722	0.313773	7	2.98231	0.607374	7	1.49652	0.217332	8	2.30045	0.543996	7	1.1437	0.29994	7	1.34976	0.289851	6	1.46727	0.240464	6	2.26734	1.06362	6	1.03504	0.44274	6	10.8147
17.5	2.50132	0.327368	7	1.79034	0.548667	6	3.90743	1.45485	7	1.27856	0.64295	6	1.45844	0.328461	8	2.18141	0.385117	6	2.2799	0.335699	7	1.95193	0.429613	7	3.25319	0.861273	7	1.58812	0.372002	8	2.13813	0.553278	7	1.25131	0.324898	7	1.39822	0.282232	6	1.52889	0.261319	6	1.67717	0.649394	6	1.07422	0.421669	6	2.80557
17.75	2.54332	0.580639	7	1.59604	0.34627	6	3.876	1.28791	7	1.26502	0.557672	6	1.43269	0.291041	8	2.55035	0.526321	6	2.25525	0.385724	7	1.98779	0.498547	7	4.31434	1.31179	7	1.33391	0.379206	8	2.64263	0.755682	7	1.15733	0.275939	7	1.25156	0.252893	6	1.44002	0.244788	6	1.45203	0.522243	6	1.17422	0.510434	6	3.11242
18	2.67458	0.539815	7	1.74456	0.438759	6	4.38813	1.48566	7	1.21499	0.481798	6	1.48835	0.300683	8	4.55563	1.46154	6	2.08745	0.308521	7	1.82815	0.50691	7	11.6835	5.17272	7	1.57158	0.501709	8	3.0156	1.08208	7	1.15089	0.311163	7	1.23891	0.227711	6	1.29305	0.287622	6	1.36905	0.441062	6	1.09326	0.393371	6	2.05879
18.25	2.51484	0.521625	7	1.25515	0.190807	6	4.58776	1.52085	7	1.32596	0.571503	6	1.54272	0.312916	8	3.85213	1.12602	6	2.17629	0.333084	7	1.58811	0.376888	7	7.9544	2.9304	7	1.64182	0.528316	8	2.62532	0.97301	7	1.0978	0.280586	7	1.20922	0.273745	6	1.38135	0.312477	6	1.77821	0.657064	6	1.16308	0.409221	6	1.72651
18.5	2.45867	0.299882	7	0.999891	0.201522	6	3.34676	1.00398	7	1.136	0.374129	6	1.39194	0.307224	8	2.41953	0.563835	6	2.21696	0.402341	7	1.61514	0.322234	7	2.77028	0.920342	7	1.51895	0.439276	8	2.20409	0.775828	7	0.9599	0.229512	7	1.2437	0.308339	6	1.57169	0.266356	6	1.5624	0.602161	6	1.07808	0.368578	6	1.61948
18.75	2.40123	0.219089	7	0.911722	0.214026	6	2.70586	0.736132	7	0.976773	0.308797	6	1.19071	0.26623	8	2.23614	0.515277	6	2.13106	0.475791	7	1.86886	0.374783	7	2.4372	0.806564	7	1.52034	0.442308	8	3.24046	1.48774	7	1.07367	0.238779	7	1.12554	0.289212	6	1.47816	0.280438	6	1.38476	0.480688	6	1.10805	0.393658	6	1.63792
19	2.53226	0.311838	7	0.937593	0.246101	6	3.21917	0.873186	7	0.95048	0.295709	6	1.22218	0.267988	8	2.62392	0.74969	6	1.8404	0.409438	7	1.87609	0.23902	7	2.24144	0.594728	7	1.63138	0.474078	8	2.83026	1.29446	7	1.05456	0.24726	7	1.15278	0.239209	6	1.27662	0.234952	6	1.27258	0.422424	6	1.32727	0.45819	6	1.65352
19.25	2.65548	0.409677	7	0.884602	0.18275	6	2.83144	0.865638	7	1.1339	0.390494	6	1.27185	0.27894	8	2.88719	0.961372	6	1.56136	0.335276	7	1.76649	0.17564	7	2.23679	0.440048	7	2.40159	0.924284	8	3.38395	1.54542	7	0.997518	0.212488	7	1.22558	0.291966	6	1.37068	0.207916	6	1.30737	0.483747	6	1.40633	0.570293	6	1.46379
19.5	2.32382	0.454541	7	0.835735	0.164031	6	2.63237	0.813758	7	1.34388	0.63936	6	1.33801	0.315265	8	2.47986	0.680469	6	1.68716	0.395182	7	1.77196	0.265606	7	2.2861	0.648298	7	2.50651	0.866716	8	3.95473	2.06971	7	1.30869	0.358491	7	1.0327	0.222062	6	1.42791	0.190326	6	1.42095	0.444273	6	1.23936	0.454157	6	1.2788
19.75	2.32761	0.453053	7	0.902318	0.185614	6	2.58998	0.72637	7	1.36705	0.74157	6	1.60711	0.533873	8	2.17909	0.512789	6	1.7602	0.542288	7	1.54303	0.316892	7	2.04429	0.462728	7	3.63715	1.73182	8	4.13873	2.71452	7	1.42926	0.629146	7	0.977438	0.218003	6	1.36424	0.199928	6	1.18598	0.409186	6	0.975735	0.285842	6	1.25139
20	2.38957	0.499828	7	0.963657	0.219914	6	2.14309	0.616417	7	1.60044	0.74216	6	1.96793	0.794132	8	2.08695	0.50936	6	1.67956	0.366477	7	1.47073	0.279086	7	2.01768	0.393764	7	14.1757	9.56744	8	3.97096	2.22442	7	1.5908	0.848459	7	0.86091	0.192969	6	1.47718	0.202304	6	1.23992	0.541819	6	0.923795	0.312793	6	1.51003
20.25	2.05731	0.392921	7	0.856051	0.225106	6	2.14884	0.611426	7	1.47791	0.708942	6	1.81865	0.673854	8	2.00745	0.453876	6	1.58972	0.211986	7	1.30359	0.214808	7	2.20668	0.496476	7	11.0879	6.74359	8	6.01405	3.84613	7	1.50149	0.704828	7	0.868415	0.186457	6	1.38008	0.262102	6	1.11668	0.393998	6	0.989771	0.338449	6	1.49596
20.5	2.07585	0.435908	7	1.13326	0.288752	6	4.64708	2.48404	7	1.1223	0.45388	6	1.96104	0.792877	8	2.27098	0.546799	6	1.76971	0.247519	7	1.15348	0.155507	7	2.08425	0.588437	7	8.31957	5.47213	8	5.3136	3.27227	7	1.50336	0.637993	7	0.932651	0.218175	6	1.20405	0.282863	6	1.02897	0.341658	6	0.847721	0.287894	6	1.32293
Panel P
	Stimulation Frequency (Hz)
EMG Frequency (Hz)	1			2			3			4			5			6			7			8			9			10			11			12			13			14			15			16			17
	Mean	SEM	N	Mean	SEM	N	Mean	SEM	N	Mean	SEM	N	Mean	SEM	N	Mean	SEM	N	Mean	SEM	N	Mean	SEM	N				Mean	SEM	N	Mean	SEM	N	Mean	SEM	N	Mean	SEM	N	Mean	SEM	N	Mean	SEM	N	Mean	SEM	N	Mean
0.5	0.0326415	0.0227042	4	0.0957375	0.0913257	4	0.026981	0.0225676	4	0.0665287	0.0595113	4	0.0111457	0.0057277	4	0.246598	0.227639	4	0.0418875	0.0348459	4	0.130943	0.10323	4	0.028968	0.0213377	4	0.0577645	0.0325093	4	0.0145492	0.0112191	4	0.0997985	0.0984176	4	0.116131	0.107481	4	0.0569443	0.0398424	4	0.00440075	0.00191407	4	0.0031325	0.000999032	4	0.025327
0.75	0.0726162	0.038197	4	0.0832423	0.0720103	4	0.02392	0.0165386	4	0.0626613	0.054299	4	0.0117433	0.00776665	4	0.137898	0.119109	4	0.0540108	0.0474538	4	0.13789	0.119479	4	0.0400125	0.0318691	4	0.0371732	0.0208367	4	0.0174443	0.0139959	4	0.0353598	0.0331706	4	0.110735	0.102738	4	0.0634337	0.0468588	4	0.00356125	0.00142171	4	0.00344225	0.000795235	4	0.053586
1	0.117749	0.064134	4	0.055037	0.0417557	4	0.0395797	0.0299717	4	0.056293	0.0501652	4	0.0100683	0.00642351	4	0.108737	0.0919508	4	0.0447935	0.0347853	4	0.145866	0.125202	4	0.0404537	0.0320658	4	0.030529	0.0165608	4	0.0177432	0.0144827	4	0.0417807	0.0396013	4	0.0718105	0.0627838	4	0.0536317	0.0348677	4	0.005528	0.00291049	4	0.00324325	0.000697026	4	0.0548265
1.25	0.073781	0.0390748	4	0.0496505	0.0290816	4	0.0316488	0.0196048	4	0.0438655	0.0324984	4	0.00882375	0.00428124	4	0.0927493	0.077713	4	0.0390525	0.02402	4	0.129146	0.112385	4	0.0383085	0.0291842	4	0.0255675	0.0132622	4	0.0148287	0.0116929	4	0.0357227	0.0338159	4	0.0796185	0.0715948	4	0.0519488	0.0367058	4	0.00344875	0.001238	4	0.002691	0.000982758	4	0.0430575
1.5	0.0586062	0.0322211	4	0.0668655	0.0393452	4	0.0362898	0.0210864	4	0.0502237	0.037525	4	0.012479	0.00752545	4	0.097384	0.0806323	4	0.0527058	0.0340936	4	0.094848	0.0797862	4	0.027269	0.020574	4	0.0201195	0.0106334	4	0.013949	0.0108942	4	0.024436	0.0223275	4	0.0816105	0.0728284	4	0.0918898	0.0729649	4	0.002989	0.00102748	4	0.00258175	0.000996389	4	0.0319608
1.75	0.065977	0.0366525	4	0.0943465	0.0502099	4	0.0534655	0.0375871	4	0.0491902	0.0386662	4	0.0150905	0.0105852	4	0.0787277	0.0625544	4	0.0477697	0.0326181	4	0.0773463	0.0640639	4	0.0448547	0.03777	4	0.019655	0.0106715	4	0.0160068	0.0131213	4	0.020362	0.0181198	4	0.0566552	0.0438128	4	0.0768127	0.0612101	4	0.002342	0.000768513	4	0.0024725	0.000372767	4	0.0338043
2	0.081953	0.0463841	4	0.218729	0.154717	4	0.054941	0.0414933	4	0.0485042	0.0374467	4	0.0162713	0.0111321	4	0.0759265	0.0609572	4	0.0494223	0.0376381	4	0.063838	0.0517806	4	0.041927	0.0340642	4	0.0270813	0.017165	4	0.0216607	0.0197207	4	0.0219517	0.0202609	4	0.0593685	0.0472283	4	0.068944	0.0568193	4	0.001758	0.000770996	4	0.0027465	0.000114442	4	0.0307215
2.25	0.0572138	0.0303149	4	0.101643	0.0633261	4	0.047498	0.0324093	4	0.054278	0.0418555	4	0.0144113	0.0100029	4	0.0443122	0.0325106	4	0.060721	0.0500322	4	0.0834595	0.0726741	4	0.0471465	0.0394854	4	0.0345035	0.0250378	4	0.0225697	0.0199833	4	0.0272748	0.025638	4	0.054116	0.0449362	4	0.0859335	0.0729159	4	0.0017405	0.000810217	4	0.00323925	0.000201401	4	0.033837
2.5	0.060954	0.033068	4	0.068146	0.0446248	4	0.0580385	0.0374873	4	0.0777633	0.0645323	4	0.0105573	0.00645671	4	0.0468478	0.0332973	4	0.0568335	0.0446276	4	0.121689	0.113857	4	0.0575087	0.0497881	4	0.0387407	0.0273592	4	0.0227875	0.0192791	4	0.0231123	0.0210226	4	0.0599732	0.0505579	4	0.101156	0.0858947	4	0.00140475	0.000552589	4	0.00361875	0.000583784	4	0.0429783
2.75	0.120673	0.0828409	4	0.0607063	0.0344594	4	0.155286	0.0928017	4	0.0740723	0.0597073	4	0.0094785	0.00525491	4	0.0646905	0.044272	4	0.0622827	0.044388	4	0.0950393	0.0856221	4	0.0615863	0.0526072	4	0.0390778	0.028449	4	0.0234497	0.019287	4	0.0212615	0.0178125	4	0.0506877	0.041176	4	0.0888915	0.0749523	4	0.00189475	0.000978278	4	0.00320075	0.000317421	4	0.0595605
3	0.153044	0.111233	4	0.0541815	0.027204	4	0.431707	0.243004	4	0.06513	0.0464017	4	0.0138827	0.00817835	4	0.0821155	0.054302	4	0.054482	0.0379613	4	0.0861797	0.0738409	4	0.0571793	0.047873	4	0.0301208	0.0204265	4	0.0270353	0.0216769	4	0.0214385	0.0166377	4	0.0494173	0.0393104	4	0.0894805	0.0723778	4	0.0023025	0.0011458	4	0.0029815	0.000195174	4	0.0517915
3.25	0.0842312	0.0514926	4	0.0557705	0.0275861	4	0.24456	0.145182	4	0.0772358	0.054414	4	0.0178643	0.0118607	4	0.0867707	0.0584267	4	0.053141	0.0404752	4	0.0824865	0.0721381	4	0.088512	0.0797021	4	0.022335	0.0145109	4	0.0294955	0.0246002	4	0.0212905	0.0179349	4	0.0429802	0.0323819	4	0.077012	0.0596797	4	0.00238525	0.00121431	4	0.004263	0.00098355	4	0.045808
3.5	0.0914323	0.0585992	4	0.0648732	0.0383705	4	0.0826655	0.0508421	4	0.0757147	0.0549054	4	0.0136863	0.00785012	4	0.0756582	0.0543312	4	0.049929	0.03663	4	0.076233	0.0641962	4	0.100642	0.0900274	4	0.0270525	0.0195929	4	0.0225915	0.0181684	4	0.0227415	0.0196038	4	0.0423275	0.0341077	4	0.0700972	0.0576016	4	0.00322975	0.00192076	4	0.00385475	0.000502677	4	0.0486092
3.75	0.11594	0.0735338	4	0.0660203	0.0363147	4	0.0549588	0.0345278	4	0.152988	0.0936826	4	0.0137315	0.00822588	4	0.0646647	0.0446967	4	0.0462627	0.0330479	4	0.0748873	0.0614075	4	0.0682335	0.0598477	4	0.039585	0.0311701	4	0.0215138	0.0167525	4	0.0233155	0.0208601	4	0.0532863	0.0434224	4	0.079378	0.0698246	4	0.0032795	0.00174419	4	0.0044345	0.00066763	4	0.0496895
4	0.0962023	0.0529716	4	0.0682035	0.0266725	4	0.0452663	0.0247977	4	0.333723	0.177635	4	0.0146465	0.0100547	4	0.0812315	0.0633921	4	0.058725	0.0429369	4	0.0530882	0.0408575	4	0.0556955	0.0456159	4	0.0345123	0.0244139	4	0.0217623	0.0173153	4	0.0182267	0.0161258	4	0.0664393	0.0530351	4	0.0813113	0.072623	4	0.00306925	0.00138062	4	0.00597225	0.00201999	4	0.0529772
4.25	0.0722115	0.0396468	4	0.0591085	0.0274153	4	0.0448895	0.0234006	4	0.210335	0.125965	4	0.0196458	0.0142538	4	0.0744133	0.0543399	4	0.0569827	0.0436195	4	0.038732	0.0291268	4	0.0638568	0.0491186	4	0.0486313	0.0383661	4	0.02547	0.0221696	4	0.0169395	0.0145234	4	0.0697855	0.0559809	4	0.0743438	0.0663524	4	0.003225	0.0013071	4	0.004561	0.000513353	4	0.0655705
4.5	0.0700448	0.0433195	4	0.0553535	0.0278283	4	0.0463727	0.0287452	4	0.102826	0.0702717	4	0.0265288	0.0214838	4	0.0714667	0.0489548	4	0.0571608	0.0408929	4	0.0361558	0.0255247	4	0.0456838	0.0309344	4	0.044081	0.0360243	4	0.0259487	0.0227666	4	0.0197347	0.0166403	4	0.076103	0.0618543	4	0.0599945	0.0524578	4	0.00335725	0.00136657	4	0.004722	0.000359481	4	0.0594768
4.75	0.0637975	0.0418484	4	0.0532103	0.0247879	4	0.0688383	0.0523987	4	0.077463	0.0525591	4	0.084083	0.0690025	4	0.0672057	0.0424943	4	0.0515992	0.0313232	4	0.0390925	0.0248013	4	0.050114	0.0385299	4	0.0471022	0.0388839	4	0.0289688	0.025208	4	0.0193005	0.0164199	4	0.077812	0.0645008	4	0.067956	0.0596934	4	0.003114	0.00153177	4	0.00514425	0.000782934	4	0.0347522
5	0.114433	0.0867563	4	0.0604865	0.0310113	4	0.0540773	0.0355945	4	0.0657932	0.0398783	4	0.293048	0.238471	4	0.0800493	0.0506843	4	0.0612832	0.0338779	4	0.0460262	0.0322616	4	0.078262	0.0637032	4	0.0645663	0.0536631	4	0.0366537	0.0334091	4	0.0224838	0.019948	4	0.0576863	0.0430223	4	0.0679238	0.0594923	4	0.00216175	0.00103811	4	0.0043045	0.000942948	4	0.033566
5.25	0.0935487	0.069121	4	0.0666068	0.0347709	4	0.0525875	0.0319795	4	0.0585455	0.0357275	4	0.123457	0.10263	4	0.0782873	0.0416077	4	0.0602	0.0334778	4	0.0586945	0.0451493	4	0.0871255	0.0719566	4	0.057716	0.0464489	4	0.033064	0.029507	4	0.0289163	0.0259956	4	0.068183	0.0550081	4	0.0523965	0.0444621	4	0.00239925	0.00124383	4	0.0051345	0.00094966	4	0.0405015
5.5	0.066664	0.0416026	4	0.072285	0.0387903	4	0.049072	0.0284967	4	0.0677528	0.0499037	4	0.030322	0.0243827	4	0.0919128	0.0487913	4	0.0507485	0.0306113	4	0.050474	0.0363957	4	0.096041	0.0786523	4	0.0592545	0.0442529	4	0.0276545	0.0243951	4	0.029762	0.0261645	4	0.0850758	0.0745155	4	0.06692	0.0600863	4	0.0032135	0.00175347	4	0.00497875	0.000697182	4	0.049035
5.75	0.0693982	0.0403085	4	0.0785452	0.0436906	4	0.051282	0.026543	4	0.066699	0.0472288	4	0.0225042	0.0174134	4	0.167838	0.0578029	4	0.0566458	0.0314937	4	0.0500143	0.0374621	4	0.0876322	0.0711626	4	0.051752	0.0381978	4	0.0293355	0.0268044	4	0.0320988	0.0288714	4	0.0594983	0.0467875	4	0.0571207	0.0520236	4	0.004183	0.00262755	4	0.00478975	0.000659176	4	0.0744295
6	0.078093	0.0448353	4	0.149241	0.0918434	4	0.0570165	0.024746	4	0.0583948	0.0356562	4	0.0153835	0.0110248	4	0.319959	0.0804713	4	0.0621068	0.0354152	4	0.0493012	0.032501	4	0.0477913	0.0353548	4	0.034177	0.0212695	4	0.0263948	0.0235977	4	0.0421745	0.0387896	4	0.0479495	0.0370137	4	0.0596218	0.0528667	4	0.006478	0.00470472	4	0.0076135	0.00218488	4	0.084977
6.25	0.0865932	0.0506668	4	0.0804625	0.0486744	4	0.0383965	0.0170423	4	0.041182	0.0225629	4	0.0140003	0.00885953	4	0.154676	0.0476595	4	0.0571362	0.0280768	4	0.0403148	0.0220762	4	0.0217245	0.00950419	4	0.0217235	0.00904631	4	0.050168	0.0464781	4	0.069799	0.0657126	4	0.0438637	0.0302583	4	0.0320825	0.0223339	4	0.00848475	0.00613351	4	0.00675625	0.0036223	4	0.0561033
6.5	0.073101	0.0439124	4	0.0481203	0.0294237	4	0.0276475	0.011707	4	0.0298262	0.0147547	4	0.0129895	0.00706868	4	0.072133	0.0296976	4	0.0685223	0.038426	4	0.0350388	0.0176422	4	0.0197758	0.0105975	4	0.018905	0.00741316	4	0.0617425	0.0582784	4	0.081103	0.0769444	4	0.02926	0.0142993	4	0.0234838	0.0137064	4	0.00680625	0.0044074	4	0.007396	0.00423601	4	0.0334363
6.75	0.0552718	0.030115	4	0.0528257	0.027586	4	0.0202665	0.0111054	4	0.0230983	0.0117553	4	0.0108115	0.00532129	4	0.0516035	0.0236383	4	0.116529	0.0759114	4	0.034833	0.0181188	4	0.0181835	0.0112008	4	0.0202128	0.00897931	4	0.039198	0.0355195	4	0.0510115	0.0474715	4	0.0239092	0.0119396	4	0.0209268	0.0114763	4	0.00720175	0.0041218	4	0.0091595	0.00505385	4	0.0168105
7	0.0553815	0.0319517	4	0.0607313	0.0313904	4	0.0233645	0.0111385	4	0.0229167	0.0116976	4	0.00947725	0.00448313	4	0.0449735	0.0243635	4	0.255646	0.147092	4	0.038585	0.0203559	4	0.0201587	0.0101189	4	0.0266972	0.013405	4	0.0210445	0.0164127	4	0.042257	0.0391088	4	0.0288492	0.0168172	4	0.0325978	0.0201119	4	0.00926725	0.00511489	4	0.00724625	0.00330014	4	0.012515
7.25	0.0460233	0.024318	4	0.0586112	0.0305725	4	0.027488	0.0130485	4	0.0210845	0.00996011	4	0.00745275	0.00259945	4	0.0509063	0.0274843	4	0.125275	0.0685036	4	0.037912	0.0176077	4	0.0266807	0.0110665	4	0.0418608	0.0276243	4	0.027608	0.0221997	4	0.0494938	0.0460158	4	0.0391183	0.0256714	4	0.033821	0.0188789	4	0.006756	0.00308111	4	0.00577175	0.0019123	4	0.0159532
7.5	0.0451573	0.0249657	4	0.0740955	0.0403032	4	0.029254	0.0130212	4	0.0178582	0.00820843	4	0.0066595	0.0018205	4	0.0565473	0.0268581	4	0.061241	0.0287322	4	0.0578375	0.0275215	4	0.049906	0.0272779	4	0.0559262	0.0391791	4	0.0235755	0.0184804	4	0.044532	0.0407314	4	0.0510465	0.038188	4	0.040739	0.0265594	4	0.00603	0.0025483	4	0.006118	0.00187097	4	0.0210763
7.75	0.082679	0.0486713	4	0.0810238	0.0438415	4	0.0329485	0.0174152	4	0.0289415	0.0160149	4	0.00699975	0.00207504	4	0.0474417	0.0221333	4	0.0862605	0.0525822	4	0.137446	0.0586916	4	0.0811787	0.0546867	4	0.076923	0.0536921	4	0.022313	0.0169888	4	0.04235	0.0382918	4	0.0653303	0.0545406	4	0.0526327	0.0422164	4	0.012685	0.00677376	4	0.00556175	0.002191	4	0.0318162
8	0.0966215	0.0545059	4	0.0857415	0.0432165	4	0.0610127	0.0442248	4	0.0549668	0.0289089	4	0.00694475	0.00238664	4	0.045467	0.0247263	4	0.106078	0.0776486	4	0.324224	0.0622465	4	0.11791	0.0892004	4	0.0946685	0.068455	4	0.0270953	0.0216664	4	0.0384377	0.0346345	4	0.0559875	0.0460088	4	0.072046	0.0611498	4	0.0325505	0.0245964	4	0.0073345	0.0033555	4	0.035394
8.25	0.0982235	0.0534412	4	0.075363	0.0434122	4	0.0734208	0.0596094	4	0.067308	0.0547436	4	0.00661425	0.00304254	4	0.064031	0.0361524	4	0.114697	0.0848307	4	0.206556	0.0651676	4	0.162974	0.130756	4	0.078608	0.0549615	4	0.0338647	0.0276796	4	0.0506113	0.0452991	4	0.0595062	0.0514025	4	0.0952545	0.082675	4	0.04195	0.0356247	4	0.00855225	0.00419784	4	0.032318
8.5	0.0980405	0.0581018	4	0.0667303	0.0447681	4	0.0586098	0.0482498	4	0.0517045	0.0473054	4	0.00769325	0.00424793	4	0.067492	0.0353241	4	0.126167	0.0998079	4	0.111107	0.0672741	4	0.222519	0.179422	4	0.066037	0.0462145	4	0.0288062	0.0228285	4	0.0408315	0.0361946	4	0.0699575	0.0597418	4	0.086665	0.0744031	4	0.0417117	0.0362758	4	0.0076755	0.00442545	4	0.04
8.75	0.101562	0.0699451	4	0.0496578	0.0352084	4	0.054566	0.0445725	4	0.0444595	0.0414096	4	0.0103023	0.00563879	4	0.055359	0.029702	4	0.113568	0.0823207	4	0.0924235	0.060279	4	0.226251	0.127509	4	0.074127	0.0495913	4	0.0223585	0.0174001	4	0.032168	0.0291914	4	0.0725403	0.0561778	4	0.0580035	0.0433007	4	0.040424	0.0349685	4	0.00809575	0.00464146	4	0.0375038
9	0.084784	0.0586692	4	0.055347	0.0407905	4	0.0757837	0.0632279	4	0.032104	0.0288978	4	0.0129215	0.00621392	4	0.045615	0.0224366	4	0.0771898	0.0534217	4	0.07048	0.0459589	4	0.44899	0.104558	4	0.0845685	0.0566009	4	0.0197315	0.0145678	4	0.0239963	0.0211248	4	0.0843113	0.0724434	4	0.0696232	0.0567105	4	0.0317938	0.0256267	4	0.00952625	0.00565905	4	0.0493095
9.25	0.090544	0.0588106	4	0.0654617	0.0522885	4	0.0754065	0.0645288	4	0.0311253	0.0257172	4	0.0147502	0.00738657	4	0.0530277	0.0275552	4	0.0621753	0.047091	4	0.0737045	0.0533986	4	0.292519	0.1017	4	0.0940793	0.0614602	4	0.0247048	0.0169041	4	0.026047	0.0230438	4	0.0887063	0.0774074	4	0.0741413	0.060652	4	0.02198	0.0160442	4	0.0149532	0.0110085	4	0.057921
9.5	0.0862772	0.0531243	4	0.0595665	0.0491039	4	0.0636582	0.0560861	4	0.0410102	0.0366377	4	0.0128975	0.00643113	4	0.078986	0.0505499	4	0.0530168	0.0367367	4	0.0800005	0.0617102	4	0.187551	0.131508	4	0.104978	0.0608368	4	0.020316	0.0135039	4	0.0197487	0.0163183	4	0.0749495	0.0583597	4	0.072595	0.0600992	4	0.0186513	0.0149348	4	0.0134512	0.00927291	4	0.050667
9.75	0.108871	0.0727354	4	0.0579715	0.0453279	4	0.0514532	0.0437919	4	0.031668	0.0285619	4	0.0150177	0.00704857	4	0.08394	0.0629225	4	0.078231	0.0591299	4	0.144769	0.128022	4	0.221703	0.184977	4	0.180654	0.0534609	4	0.0186338	0.0125358	4	0.0150008	0.0109766	4	0.072065	0.0567161	4	0.0662883	0.0527463	4	0.0111492	0.00748408	4	0.0112362	0.00690648	4	0.048439
10	0.0945905	0.0654371	4	0.0639135	0.0432314	4	0.0542225	0.0471502	4	0.0378208	0.034662	4	0.033056	0.01285	4	0.0815132	0.0569092	4	0.0847413	0.0649314	4	0.121098	0.102818	4	0.127144	0.103846	4	0.456426	0.183255	4	0.0234808	0.0147757	4	0.019405	0.0135096	4	0.0630472	0.054251	4	0.069028	0.0569755	4	0.0107895	0.00702954	4	0.013478	0.00892826	4	0.038572
10.25	0.078978	0.0610013	4	0.046406	0.0297565	4	0.0480758	0.0411346	4	0.0386042	0.034457	4	0.0276592	0.010572	4	0.061834	0.0400354	4	0.0650648	0.0504704	4	0.098902	0.0846146	4	0.141308	0.120212	4	0.240073	0.071405	4	0.036689	0.0207813	4	0.0193015	0.0137342	4	0.062717	0.0544567	4	0.0601312	0.0519639	4	0.00923675	0.0059089	4	0.01211	0.00808255	4	0.048295
10.5	0.0594667	0.0480699	4	0.038738	0.0265535	4	0.0472808	0.041109	4	0.0508852	0.0459025	4	0.0210285	0.0097903	4	0.0647185	0.0420154	4	0.0641802	0.0499523	4	0.122585	0.107898	4	0.120779	0.0965893	4	0.0891265	0.0416245	4	0.0423653	0.0267747	4	0.014942	0.00975249	4	0.0663045	0.0579252	4	0.0674508	0.0591893	4	0.0073605	0.00259708	4	0.01397	0.0101927	4	0.054059
10.75	0.0448588	0.0368195	4	0.0337047	0.0237838	4	0.0357953	0.0301195	4	0.0323473	0.0268528	4	0.0324817	0.0161472	4	0.070166	0.0442716	4	0.0546715	0.0414632	4	0.118717	0.10292	4	0.118238	0.0980262	4	0.0761307	0.0430666	4	0.109892	0.0561315	4	0.015361	0.00981199	4	0.0558732	0.0480228	4	0.0497013	0.0415809	4	0.0069905	0.001414	4	0.013942	0.00916954	4	0.0451125
11	0.050798	0.04389	4	0.0362522	0.0291327	4	0.039598	0.0318235	4	0.034332	0.0261118	4	0.0370858	0.0190704	4	0.090184	0.0599868	4	0.0762905	0.059873	4	0.088096	0.0702575	4	0.122785	0.100185	4	0.0778133	0.0612456	4	0.298896	0.117186	4	0.0156613	0.0102875	4	0.0560522	0.0494716	4	0.0339653	0.0279323	4	0.00644575	0.000974567	4	0.013982	0.00818356	4	0.0473138
11.25	0.037175	0.0316365	4	0.036355	0.0304125	4	0.044161	0.033627	4	0.0368795	0.0278548	4	0.0347568	0.0188578	4	0.0927475	0.0700449	4	0.0842787	0.065056	4	0.0577887	0.0397656	4	0.110502	0.0902372	4	0.0968248	0.0868505	4	0.16768	0.0670429	4	0.0201797	0.0137714	4	0.0758542	0.0674902	4	0.049689	0.04309	4	0.00712625	0.000850027	4	0.016161	0.0115179	4	0.0485925
11.5	0.0273108	0.0220848	4	0.0303545	0.0225375	4	0.0364005	0.023016	4	0.034327	0.0208451	4	0.0306115	0.014574	4	0.0821623	0.0579436	4	0.051922	0.0362777	4	0.0333645	0.0140306	4	0.0879412	0.0696168	4	0.106207	0.0943843	4	0.11842	0.102132	4	0.0325968	0.0234163	4	0.0697845	0.0585561	4	0.083683	0.0763719	4	0.0068125	0.000673522	4	0.0145708	0.00950212	4	0.046323
11.75	0.0237635	0.0192202	4	0.0275558	0.0178409	4	0.0405758	0.0238243	4	0.0379253	0.0229939	4	0.0316825	0.0137601	4	0.0926393	0.0588312	4	0.0305132	0.018725	4	0.0304132	0.0136497	4	0.0966247	0.0814271	4	0.0861318	0.075679	4	0.176068	0.155862	4	0.0837823	0.0528069	4	0.0546725	0.0433956	4	0.0938305	0.0836559	4	0.00595525	0.00172371	4	0.02431	0.0173046	4	0.059071
12	0.018766	0.0152499	4	0.015516	0.00592767	4	0.0392815	0.0162976	4	0.0480295	0.0272898	4	0.0292728	0.0120839	4	0.197201	0.0993926	4	0.0286755	0.0202476	4	0.029021	0.0176724	4	0.054134	0.0415928	4	0.0361752	0.0272718	4	0.162639	0.14666	4	0.224543	0.098328	4	0.0583248	0.047362	4	0.0679825	0.0520844	4	0.0056125	0.00156084	4	0.0450785	0.0381252	4	0.0725892
12.25	0.016555	0.0131018	4	0.0147405	0.0056778	4	0.044298	0.0183768	4	0.0517555	0.0251645	4	0.0288163	0.0129786	4	0.19006	0.147292	4	0.0257458	0.0174204	4	0.0189865	0.0119367	4	0.0270293	0.0158737	4	0.024342	0.0150729	4	0.134064	0.125414	4	0.155109	0.0837301	4	0.0490608	0.0359655	4	0.0493712	0.035028	4	0.00832725	0.00218227	4	0.0366968	0.0292301	4	0.0425932
12.5	0.0147225	0.00819785	4	0.0242935	0.0117186	4	0.0429285	0.0187951	4	0.0685995	0.0372611	4	0.02163	0.0104975	4	0.110829	0.102075	4	0.0227467	0.0141962	4	0.0188843	0.0111421	4	0.0215825	0.00767626	4	0.0213388	0.0110606	4	0.080748	0.0732353	4	0.0735028	0.062338	4	0.0586947	0.0393289	4	0.0355092	0.0215826	4	0.0133253	0.00419176	4	0.026669	0.017925	4	0.0445163
12.75	0.0190867	0.0079762	4	0.0284327	0.0145105	4	0.0294975	0.0105841	4	0.0693673	0.0447583	4	0.00906175	0.00238271	4	0.0569448	0.048315	4	0.0233453	0.0137453	4	0.0243447	0.0157438	4	0.0185375	0.0029253	4	0.0186832	0.00874373	4	0.085732	0.0786069	4	0.0911035	0.0827932	4	0.0837018	0.0342404	4	0.0316815	0.0168467	4	0.014856	0.00498362	4	0.0199588	0.0109741	4	0.0607427
13	0.0240598	0.0111871	4	0.0371442	0.0201776	4	0.0238753	0.00931167	4	0.068043	0.0444328	4	0.009478	0.0025219	4	0.0294673	0.0218807	4	0.0230385	0.0126577	4	0.0298227	0.0219466	4	0.0129722	0.00213519	4	0.01608	0.00611305	4	0.066195	0.0568697	4	0.108765	0.0978282	4	0.207236	0.0877193	4	0.0259002	0.0116399	4	0.0124627	0.00435638	4	0.015196	0.00649143	4	0.038135
13.25	0.02682	0.0129405	4	0.0382017	0.0211083	4	0.020393	0.00882236	4	0.0455943	0.0230985	4	0.0113253	0.00377243	4	0.022556	0.0134973	4	0.0199445	0.0077999	4	0.0273835	0.0197603	4	0.0117567	0.00183215	4	0.0154497	0.00603788	4	0.0493297	0.0330185	4	0.114031	0.0991612	4	0.115154	0.0381502	4	0.0260678	0.0146512	4	0.0106517	0.00376832	4	0.0178225	0.0102636	4	0.0188655
13.5	0.0267475	0.0129325	4	0.036287	0.0212234	4	0.0139977	0.00675447	4	0.0298598	0.0140477	4	0.0129275	0.00414578	4	0.0245935	0.00923322	4	0.024779	0.00833912	4	0.033519	0.0207705	4	0.0157315	0.0045406	4	0.025115	0.0106831	4	0.0624825	0.0434508	4	0.0697895	0.0552236	4	0.034129	0.01395	4	0.0291647	0.0114257	4	0.0122575	0.00450887	4	0.0144557	0.00482053	4	0.0182828
13.75	0.033196	0.0182068	4	0.036937	0.0251623	4	0.0132052	0.00684531	4	0.029571	0.0128743	4	0.01406	0.00600061	4	0.0284138	0.00876743	4	0.0388485	0.00824853	4	0.0372015	0.0219589	4	0.0192513	0.00575724	4	0.029026	0.0127035	4	0.0371838	0.0253066	4	0.046843	0.0357711	4	0.0325327	0.0180926	4	0.047011	0.00865335	4	0.0130703	0.00525272	4	0.0102915	0.00301983	4	0.017233
14	0.0358593	0.0181841	4	0.0554625	0.0425129	4	0.0131335	0.00534458	4	0.0212087	0.00843098	4	0.011799	0.00365243	4	0.0239173	0.00812541	4	0.0570915	0.0174588	4	0.0412942	0.0230872	4	0.020047	0.005677	4	0.032924	0.0190335	4	0.017652	0.0107181	4	0.0358878	0.0303894	4	0.0384205	0.0239147	4	0.175655	0.050479	4	0.0139763	0.00607359	4	0.011179	0.00376784	4	0.0135517
14.25	0.0443605	0.0212846	4	0.0684878	0.0441227	4	0.0206922	0.00924753	4	0.0179645	0.0065333	4	0.0114035	0.00341045	4	0.0271935	0.0110561	4	0.03969	0.00744386	4	0.036583	0.0172595	4	0.017628	0.00530192	4	0.034707	0.0202617	4	0.0271555	0.0194096	4	0.049251	0.0448479	4	0.0569705	0.0306708	4	0.244467	0.134972	4	0.0184108	0.00856557	4	0.008491	0.00364996	4	0.0137045
14.5	0.0627068	0.0332946	4	0.0670535	0.0431298	4	0.0229795	0.00967174	4	0.016177	0.00559429	4	0.009755	0.00214353	4	0.0298415	0.0141405	4	0.0364973	0.0137141	4	0.0315305	0.0141596	4	0.0231953	0.0077471	4	0.0409113	0.023766	4	0.0481487	0.0395776	4	0.07668	0.0722236	4	0.0539835	0.0274717	4	0.0765597	0.0372687	4	0.020715	0.00929345	4	0.00846925	0.00275763	4	0.0184165
14.75	0.0548537	0.0285628	4	0.0713977	0.0427073	4	0.0286773	0.0129289	4	0.016247	0.00726774	4	0.0106053	0.00294022	4	0.0327013	0.0146577	4	0.0555682	0.0249543	4	0.038901	0.0198595	4	0.0347058	0.0143277	4	0.0458303	0.0263815	4	0.0308548	0.0245819	4	0.0723215	0.0680382	4	0.0484088	0.0250903	4	0.0578755	0.0279364	4	0.0341972	0.0109174	4	0.0116337	0.00323323	4	0.0258455
15	0.0467533	0.0235545	4	0.0676565	0.0425021	4	0.055756	0.0304544	4	0.0198035	0.0117007	4	0.0234372	0.0106665	4	0.0405068	0.0181278	4	0.0397153	0.0165098	4	0.0516433	0.0318933	4	0.0432232	0.02114	4	0.0445655	0.0222816	4	0.022374	0.0167495	4	0.0488955	0.0431462	4	0.0568758	0.0328489	4	0.0555382	0.0288942	4	0.137472	0.100207	4	0.01104	0.003717	4	0.027643
15.25	0.0528723	0.0280205	4	0.0492718	0.0289557	4	0.037772	0.0181539	4	0.0186198	0.0113969	4	0.0146993	0.00500299	4	0.0479023	0.0232722	4	0.0580345	0.0335382	4	0.0668145	0.0432127	4	0.0464803	0.0257193	4	0.057949	0.030302	4	0.023754	0.0163485	4	0.0460733	0.0393382	4	0.0643845	0.0407761	4	0.0438885	0.0198286	4	0.0916658	0.053022	4	0.0119848	0.00366873	4	0.0319728
15.5	0.0627045	0.0336552	4	0.0547975	0.0320736	4	0.0408572	0.0257362	4	0.024418	0.0160767	4	0.00821475	0.00197	4	0.0412218	0.0199662	4	0.0783453	0.0524383	4	0.0850445	0.0547273	4	0.0453358	0.0263002	4	0.0681868	0.0520291	4	0.0244557	0.0176519	4	0.0424542	0.0375802	4	0.064831	0.0434003	4	0.041784	0.0194453	4	0.0324048	0.0172664	4	0.0110635	0.00360251	4	0.0341305
15.75	0.060192	0.0332259	4	0.0591132	0.0366628	4	0.0396888	0.027657	4	0.0250262	0.013911	4	0.0065355	0.00209598	4	0.036231	0.0168019	4	0.0949515	0.0665978	4	0.126777	0.0733833	4	0.0767923	0.0548433	4	0.0752523	0.0569975	4	0.0241657	0.0184747	4	0.0407423	0.0366848	4	0.0513907	0.0314249	4	0.0611763	0.032453	4	0.0414168	0.0254704	4	0.0215355	0.00489795	4	0.0334277
16	0.061988	0.0364818	4	0.0696968	0.0415013	4	0.0424308	0.0307352	4	0.0453855	0.0241971	4	0.0063535	0.00197183	4	0.0386073	0.0204603	4	0.080842	0.0560179	4	0.245894	0.103812	4	0.0987955	0.0676223	4	0.0834533	0.0564532	4	0.0249745	0.0202552	4	0.0480057	0.0443385	4	0.056275	0.03472	4	0.070164	0.0376946	4	0.0490712	0.037178	4	0.0934985	0.0247491	4	0.0413
16.25	0.069669	0.0401155	4	0.0509187	0.0313752	4	0.0631852	0.0534051	4	0.0672477	0.0545447	4	0.007958	0.00197527	4	0.0359985	0.0196008	4	0.0690908	0.0483743	4	0.17695	0.0735469	4	0.130782	0.0953715	4	0.0781275	0.0570341	4	0.0240073	0.018598	4	0.053664	0.0499257	4	0.0527717	0.0302463	4	0.0789732	0.0521768	4	0.0770513	0.065671	4	0.0537272	0.0092645	4	0.0477983
16.5	0.0840738	0.0536689	4	0.0614852	0.0464787	4	0.0656415	0.055738	4	0.073166	0.0678526	4	0.0125997	0.00501744	4	0.041052	0.0244754	4	0.0698118	0.0472853	4	0.104158	0.0586563	4	0.149961	0.121995	4	0.0877113	0.062448	4	0.0271845	0.0172148	4	0.0532268	0.0492304	4	0.0536605	0.0328445	4	0.0882783	0.0671418	4	0.073126	0.0628421	4	0.0166722	0.00774101	4	0.0555025
16.75	0.0836542	0.0590587	4	0.057609	0.043952	4	0.0552962	0.0452948	4	0.0674597	0.0626701	4	0.0135015	0.00607922	4	0.0374147	0.0204192	4	0.0829378	0.0538262	4	0.0836193	0.0573826	4	0.101105	0.0738919	4	0.0801875	0.0543773	4	0.0268798	0.0195358	4	0.0532352	0.0492288	4	0.0677457	0.0486071	4	0.0793747	0.0648698	4	0.0497273	0.0417678	4	0.014369	0.00642086	4	0.0868903
17	0.0884277	0.0642053	4	0.0662153	0.0496348	4	0.0602492	0.0506116	4	0.0418818	0.0375259	4	0.0109362	0.00441911	4	0.035468	0.0169488	4	0.101748	0.0753627	4	0.0689422	0.0438004	4	0.104241	0.0719694	4	0.0729655	0.0520859	4	0.0290308	0.0226876	4	0.040412	0.035914	4	0.0618145	0.0438458	4	0.0632335	0.0509241	4	0.0478462	0.0393635	4	0.0113355	0.00460758	4	0.179665
17.25	0.079827	0.0517116	4	0.0593887	0.038609	4	0.0706197	0.062371	4	0.031991	0.0267558	4	0.00938025	0.00270536	4	0.0478268	0.0250169	4	0.101382	0.0760295	4	0.0636498	0.0399928	4	0.119219	0.0882919	4	0.060258	0.0443854	4	0.0306352	0.022769	4	0.045021	0.04106	4	0.0656623	0.0478376	4	0.0599257	0.0470554	4	0.059403	0.0492964	4	0.00858125	0.00333942	4	0.117751
17.5	0.086182	0.0601675	4	0.0519175	0.0326058	4	0.074762	0.0650236	4	0.0257015	0.0192154	4	0.011231	0.00432119	4	0.051419	0.02704	4	0.0827568	0.0589401	4	0.0588682	0.0330866	4	0.111346	0.0730007	4	0.0469958	0.0324653	4	0.0267645	0.0199526	4	0.0560312	0.0519212	4	0.0681127	0.0497768	4	0.056879	0.0422714	4	0.0490683	0.0418584	4	0.0104963	0.00444447	4	0.0656905
17.75	0.068096	0.0436605	4	0.0546623	0.0393049	4	0.0529095	0.0410648	4	0.0306797	0.0237431	4	0.016102	0.00744793	4	0.0563362	0.0270294	4	0.079658	0.0587123	4	0.06204	0.0375849	4	0.133047	0.0692176	4	0.0468423	0.0293527	4	0.0315407	0.0220075	4	0.0418787	0.0379172	4	0.0631488	0.0471897	4	0.0585422	0.0444506	4	0.0539577	0.0471875	4	0.0105228	0.00480543	4	0.0620775
18	0.0950975	0.0637484	4	0.062417	0.0426772	4	0.0521322	0.0328453	4	0.0366078	0.0291823	4	0.0141765	0.00443854	4	0.10514	0.0545118	4	0.0784342	0.057567	4	0.0585875	0.0345033	4	0.271192	0.118936	4	0.0549248	0.03235	4	0.0334952	0.0209209	4	0.0320643	0.0280817	4	0.0613015	0.0453369	4	0.043297	0.0301809	4	0.0497145	0.0424479	4	0.010343	0.00578011	4	0.0450752
18.25	0.0800638	0.0477783	4	0.0549328	0.0393212	4	0.0600975	0.0431895	4	0.046915	0.0379542	4	0.0142468	0.00439351	4	0.0893485	0.0438687	4	0.0844765	0.0637395	4	0.0547755	0.0335399	4	0.184422	0.0809535	4	0.0516625	0.0262728	4	0.0341072	0.0226495	4	0.0287625	0.025011	4	0.0497228	0.0359661	4	0.046683	0.0340285	4	0.050462	0.0426046	4	0.0126775	0.00706169	4	0.037404
18.5	0.0739382	0.0465117	4	0.0585748	0.0452915	4	0.0571185	0.0457386	4	0.045226	0.0382082	4	0.0129718	0.004802	4	0.0474977	0.0228399	4	0.0624265	0.0420023	4	0.0570857	0.0361988	4	0.0869455	0.0479171	4	0.0549147	0.0322954	4	0.026412	0.0167603	4	0.0275555	0.0239873	4	0.064483	0.0509651	4	0.0666102	0.0520634	4	0.0414648	0.0354745	4	0.0147445	0.00975899	4	0.0324007
18.75	0.0845163	0.0568851	4	0.0470498	0.0350497	4	0.0532002	0.0438309	4	0.0295877	0.0240256	4	0.0105977	0.00438822	4	0.042012	0.0202917	4	0.0431697	0.0224737	4	0.0621908	0.0408368	4	0.0791733	0.0456521	4	0.0562725	0.0348655	4	0.0332187	0.0155289	4	0.0261315	0.0204793	4	0.0498308	0.0379371	4	0.0527465	0.0401834	4	0.0310643	0.0260816	4	0.0158045	0.0105694	4	0.0343425
19	0.0799207	0.0491031	4	0.04022	0.0272149	4	0.059726	0.0470987	4	0.0298585	0.024786	4	0.00951125	0.00415797	4	0.0530147	0.0265151	4	0.0496887	0.0262903	4	0.0576687	0.0373495	4	0.0674967	0.0407128	4	0.0625385	0.0391009	4	0.0311997	0.0147895	4	0.0315635	0.0236436	4	0.0583205	0.0460391	4	0.0449235	0.0348924	4	0.0269145	0.0219905	4	0.0119697	0.00529421	4	0.0378143
19.25	0.102564	0.0767349	4	0.0484767	0.037248	4	0.0563258	0.0453326	4	0.0331302	0.0274554	4	0.0111995	0.00520426	4	0.0576535	0.0292459	4	0.04868	0.0300526	4	0.0565488	0.0394492	4	0.0707228	0.0448408	4	0.0676135	0.0364135	4	0.0278877	0.0110426	4	0.032773	0.0274461	4	0.0635155	0.0496704	4	0.0466688	0.034457	4	0.0249532	0.0193803	4	0.0131205	0.00692761	4	0.033723
19.5	0.0747765	0.0573471	4	0.0501005	0.0402662	4	0.0550415	0.0477966	4	0.0255335	0.0189351	4	0.012552	0.00668639	4	0.0502942	0.0267746	4	0.0547555	0.0324936	4	0.0492797	0.0330132	4	0.0615487	0.0405783	4	0.0633278	0.0291561	4	0.032644	0.013454	4	0.027884	0.0238024	4	0.0485688	0.0393844	4	0.0551152	0.0432737	4	0.0310843	0.0256509	4	0.0144543	0.0089383	4	0.0334943
19.75	0.0730285	0.0583219	4	0.0612178	0.0513582	4	0.0479217	0.039548	4	0.024426	0.017505	4	0.0152462	0.00876474	4	0.0478162	0.0274865	4	0.0514073	0.0301563	4	0.0367385	0.0225262	4	0.0483377	0.029626	4	0.084171	0.0353143	4	0.0359377	0.0166388	4	0.0260727	0.0231038	4	0.04056	0.0330017	4	0.051397	0.0396544	4	0.0309787	0.0261123	4	0.0131888	0.00877007	4	0.0302362
20	0.0700387	0.055599	4	0.0497585	0.0374796	4	0.0388905	0.0304862	4	0.040149	0.0290204	4	0.0190465	0.0093416	4	0.062937	0.0435582	4	0.0622335	0.0409636	4	0.0435437	0.0293555	4	0.0561308	0.0326313	4	0.223781	0.0835111	4	0.0384147	0.019051	4	0.0325312	0.0296726	4	0.0425352	0.0359278	4	0.0422495	0.0322381	4	0.035394	0.0297086	4	0.0115432	0.0073353	4	0.0328707
20.25	0.052543	0.0384481	4	0.0360255	0.0261454	4	0.0316878	0.0243893	4	0.0371752	0.0281521	4	0.0196522	0.0104686	4	0.058975	0.0375642	4	0.0713523	0.0519384	4	0.0576253	0.0436777	4	0.0624417	0.0367377	4	0.162786	0.061339	4	0.0545952	0.0265655	4	0.025569	0.0216963	4	0.0427423	0.0356735	4	0.0355345	0.0274775	4	0.0263283	0.0215146	4	0.0170383	0.0123822	4	0.0475452
20.5	0.0438308	0.0319383	4	0.0370905	0.0295977	4	0.0487957	0.0390458	4	0.031163	0.0263704	4	0.019893	0.0110949	4	0.055161	0.0307989	4	0.0601223	0.0359395	4	0.0559192	0.0415949	4	0.0558185	0.0358316	4	0.0650085	0.0282543	4	0.05272	0.0265499	4	0.0248072	0.019933	4	0.0488587	0.0423575	4	0.0490615	0.0420463	4	0.024476	0.020046	4	0.019539	0.0155234	4	0.041519
[truncated: 11 more columns]
