# Supplementary material for: Purkinje cell misfiring generates high-amplitude action tremors that are corrected by cerebellar deep brain stimulation
Source: eLife. 2020 Mar 17;9:e51928. doi: 10.7554/eLife.51928 (PMC7077982; doi:10.7554/eLife.51928)
Supplement: Figure 5—source data 1. [file elife-51928-fig5-data1.xlsx]

## Sheet: Sheet1
FIGURE 5
Panel H
	Baseline			Harmaline			Closed Loop DBS + Harmaline
Frequency (Hz)	Mean	SEM	N	Mean	SEM	N	Mean	SEM	N
0	6.55856e-08	1.96053e-08	8	1.58584e-07	7.63823e-08	8	4.882e-08	2.94601e-08	8
0.5	4.17505e-08	1.15062e-08	8	9.01388e-08	3.83865e-08	8	3.0885e-08	1.5663e-08	8
1	6.53342e-09	6.97809e-10	8	8.83375e-09	1.74113e-09	8	7.14375e-09	1.11199e-09	8
1.5	5.5037e-09	3.80584e-10	8	7.66625e-09	1.45437e-09	8	6.67125e-09	1.00338e-09	8
2	5.59615e-09	4.18769e-10	8	7.735e-09	1.53952e-09	8	6.60625e-09	1.20796e-09	8
2.5	6.81949e-09	5.49421e-10	8	8.5475e-09	1.34982e-09	8	6.855e-09	1.23937e-09	8
3	1.01804e-08	1.2182e-09	8	1.0185e-08	1.30957e-09	8	7.49e-09	1.16788e-09	8
3.5	1.67561e-08	2.9588e-09	8	1.49212e-08	1.85727e-09	8	9.74875e-09	1.56034e-09	8
4	2.99692e-08	6.23076e-09	8	2.74075e-08	6.70606e-09	8	1.67038e-08	4.2006e-09	8
4.5	6.05104e-08	1.33745e-08	8	6.08125e-08	2.20655e-08	8	3.87137e-08	1.32875e-08	8
5	1.27254e-07	2.99948e-08	8	1.41659e-07	5.68236e-08	8	7.053e-08	2.81714e-08	8
5.5	2.04504e-07	4.51224e-08	8	2.92988e-07	1.04933e-07	8	1.22954e-07	5.17678e-08	8
6	3.80656e-07	8.62955e-08	8	5.93163e-07	2.21437e-07	8	3.26961e-07	1.50823e-07	8
6.5	8.07469e-07	1.90894e-07	8	1.44084e-06	5.26402e-07	8	8.37194e-07	3.71235e-07	8
7	1.69773e-06	4.26253e-07	8	3.66469e-06	1.33033e-06	8	1.86436e-06	7.88094e-07	8
7.5	3.08732e-06	7.44138e-07	8	6.33611e-06	1.75107e-06	8	3.61544e-06	1.03767e-06	8
8	5.55695e-06	2.05305e-06	8	1.05495e-05	4.31899e-06	8	7.5125e-06	3.41557e-06	8
8.5	1.23782e-05	6.2882e-06	8	1.88245e-05	7.82781e-06	8	1.38738e-05	9.10439e-06	8
9	1.29082e-05	5.46818e-06	8	3.51e-05	1.10288e-05	8	1.78975e-05	1.05996e-05	8
9.5	6.78907e-06	1.97758e-06	8	6.66138e-05	2.1107e-05	8	1.64757e-05	7.7635e-06	8
10	3.92662e-06	7.62577e-07	8	0.000144887	6.80097e-05	8	2.06379e-05	1.06113e-05	8
10.5	3.05654e-06	6.85558e-07	8	0.000194084	9.41202e-05	8	2.916e-05	1.45676e-05	8
11	2.72824e-06	8.86992e-07	8	0.000151475	5.93706e-05	8	2.47612e-05	1.14947e-05	8
11.5	2.71437e-06	1.43326e-06	8	0.000110863	5.23606e-05	8	1.79299e-05	7.54115e-06	8
12	3.39021e-06	2.50925e-06	8	7.71463e-05	3.08688e-05	8	1.8241e-05	8.02787e-06	8
12.5	5.11202e-06	4.38871e-06	8	6.127e-05	2.99117e-05	8	1.19831e-05	4.23955e-06	8
13	4.4268e-06	3.78824e-06	8	3.5065e-05	1.39654e-05	8	1.09745e-05	5.18225e-06	8
13.5	3.37232e-06	2.78347e-06	8	1.82825e-05	7.01248e-06	8	1.06602e-05	7.02073e-06	8
14	2.77805e-06	2.11163e-06	8	1.61675e-05	5.16217e-06	8	7.48787e-06	4.3379e-06	8
14.5	2.03792e-06	1.38654e-06	8	1.48525e-05	4.37551e-06	8	5.3215e-06	2.58636e-06	8
15	1.52142e-06	8.8626e-07	8	1.098e-05	3.70098e-06	8	4.12987e-06	2.18725e-06	8
15.5	1.44052e-06	7.27468e-07	8	7.21463e-06	2.38283e-06	8	4.68813e-06	3.09164e-06	8
16	1.23064e-06	4.6159e-07	8	5.70587e-06	1.87859e-06	8	3.59037e-06	2.25947e-06	8
16.5	9.59934e-07	2.89838e-07	8	3.98325e-06	1.28772e-06	8	2.41337e-06	1.29367e-06	8
17	6.95983e-07	2.10066e-07	8	2.85263e-06	7.40758e-07	8	1.89338e-06	1.01573e-06	8
17.5	6.13687e-07	1.96271e-07	8	2.06275e-06	4.37627e-07	8	1.28525e-06	5.29007e-07	8
18	5.23583e-07	1.52815e-07	8	1.72675e-06	4.1968e-07	8	1.243e-06	6.24812e-07	8
18.5	3.75426e-07	9.09752e-08	8	1.466e-06	4.05062e-07	8	9.6275e-07	5.22302e-07	8
19	2.98991e-07	6.58272e-08	8	1.16762e-06	3.52011e-07	8	7.06725e-07	3.64915e-07	8
19.5	2.38171e-07	4.2619e-08	8	1.0095e-06	2.18406e-07	8	5.20512e-07	2.64855e-07	8
20	3.23461e-07	1.09667e-07	8	1.34525e-06	3.71326e-07	8	4.08463e-07	1.81041e-07	8
20.5	6.05333e-07	3.78288e-07	8	1.49113e-06	4.56079e-07	8	3.73125e-07	1.43284e-07	8
21	6.91925e-07	4.76636e-07	8	1.4335e-06	4.52209e-07	8	3.77175e-07	1.15584e-07	8
21.5	5.4874e-07	3.22084e-07	8	1.131e-06	3.22109e-07	8	3.78587e-07	1.25713e-07	8
22	4.9149e-07	2.38291e-07	8	1.00613e-06	2.75597e-07	8	3.76013e-07	1.18034e-07	8
22.5	4.89072e-07	2.00524e-07	8	9.07125e-07	2.66121e-07	8	3.33587e-07	1.00234e-07	8
23	4.74504e-07	1.60125e-07	8	8.55e-07	2.44432e-07	8	3.08725e-07	1.06797e-07	8
23.5	5.30691e-07	2.08734e-07	8	8.1955e-07	2.07219e-07	8	3.01475e-07	9.99409e-08	8
24	6.34284e-07	3.0768e-07	8	8.05175e-07	1.75365e-07	8	3.169e-07	9.74342e-08	8
24.5	6.61436e-07	3.45662e-07	8	7.678e-07	1.79223e-07	8	3.25025e-07	9.9262e-08	8
25	5.08311e-07	2.43127e-07	8	6.11563e-07	1.42575e-07	8	2.64813e-07	8.59128e-08	8
25.5	3.74052e-07	1.53886e-07	8	4.393e-07	8.57978e-08	8	2.03862e-07	6.36497e-08	8
26	2.70362e-07	9.84225e-08	8	3.45725e-07	6.35341e-08	8	1.96625e-07	6.6809e-08	8
26.5	2.3152e-07	7.76821e-08	8	2.7775e-07	5.70294e-08	8	2.093e-07	7.84248e-08	8
27	1.9811e-07	5.9831e-08	8	2.70238e-07	5.64817e-08	8	1.6565e-07	6.21853e-08	8
27.5	1.76924e-07	4.86228e-08	8	2.13375e-07	4.42983e-08	8	1.35637e-07	5.17589e-08	8
28	1.5693e-07	4.22499e-08	8	2.03912e-07	4.34703e-08	8	1.31962e-07	5.00245e-08	8
28.5	1.38532e-07	3.91629e-08	8	2.05463e-07	4.6218e-08	8	1.246e-07	4.36567e-08	8
29	1.33227e-07	4.0064e-08	8	1.89062e-07	4.06881e-08	8	1.0555e-07	3.50202e-08	8
29.5	1.35944e-07	4.28767e-08	8	1.66225e-07	3.52307e-08	8	9.6075e-08	2.97693e-08	8
30	1.31901e-07	4.271e-08	8	1.50488e-07	3.6206e-08	8	8.064e-08	2.4473e-08	8
Panel I
		Closed Loop DBS + Harmaline
Baseline	Harmaline
0.133772	1	0.316592
0.33635	1	0.121988
0.0453671	1	0.0347736
0.0175289	1	0.448498
0.010825	1	0.068132
0.115075	1	0.061742
0.027537	1	0.185814
0.050185	1	0.465533
